28 **ABSTRACT**

29 SIVsmm infecting sooty mangabeys has been transmitted to humans on at least nine independent  
30 occasions, giving rise to HIV-2 groups A to I. SIVsmm isolates replicate in human T cells and  
31 seem capable of overcoming major human restriction factors without adaptation. However, only  
32 groups A and B are responsible for the HIV-2 epidemic in Sub-Saharan Africa and it is largely  
33 unclear whether adaptive changes were associated with significant spread in humans. To address  
34 this, we examined the sensitivity of infectious molecular clones (IMCs) of five HIV-2 strains (4  
35 group A and one AB recombinant) and representatives of five different SIVsmm lineages to  
36 inhibition by type I interferon (IFN) and various APOBEC3 proteins. We confirmed that SIVsmm  
37 strains replicate in primary human CD4<sup>+</sup> T cells. However, SIVsmm replication was highly  
38 variable, typically lower relative to HIV-2 isolates and almost entirely prevented by type I IFN  
39 treatment. Viral propagation was generally dependent on intact *vif* genes, highlighting the need for  
40 efficient counteraction of APOBEC3 proteins. On average, SIVsmm strains were significantly  
41 more susceptible to inhibition by human APOBEC3D, F, G and H than HIV-2 IMCs. For example,  
42 human APOBEC3F reduced infectious virus yield of SIVsmm by ~80% but achieved only ~40%  
43 in the case of HIV-2. Functional and mutational analyses of human, sooty mangabey and rhesus  
44 macaque derived alleles revealed that an R128T polymorphism in APOBEC3F is important for  
45 species-specific counteraction by HIV-2 and SIVsmm Vif proteins. In addition, we found that  
46 changes of Y45H and T84S in SIVsmm Vif increase its ability to antagonize human APOBEC3F.  
47 Altogether, our results show that SIVsmm Vifs show some intrinsic activity against human  
48 ABOBEC3 proteins, but HIV-2 Vifs acquired adaptive changes to efficiently clear this barrier in  
49 the human host.

50 **AUTHOR SUMMARY**

51 SIVs infecting African monkey species do not infect humans, with one notable exception. SIVsmm  
52 from sooty mangabeys managed to cross the species barrier to humans on at least nine independent  
53 occasions. This is because SIVsmm strains seem capable of overcoming many innate defense  
54 mechanisms without adaptation and that their Vif proteins are active against human APOBEC3  
55 proteins. Here, we show that replication of SIVsmm is highly variable in human CD4 T cells and  
56 more sensitive to interferon inhibition compared to HIV-2. While different lineages of SIVsmm  
57 were capable of counteracting human APOBEC3 proteins in a Vif-dependent manner, they were  
58 significantly more susceptible to inhibition by APOBEC3D/F/G/H compared to HIV-2.  
59 Mutational analyses revealed an R128T substitution in APOBEC3F and a T84S change in Vif are  
60 relevant for species-specific counteraction by HIV-2 and SIVsmm. Altogether, our results support  
61 that HIV-2 group A adapted to humans prior to or during epidemic spread.

## 62 INTRODUCTION

63 Simian immunodeficiency viruses (SIV) have been infecting primates for many hundreds of  
64 thousands or even millions of years [1]. However, only in the 20th century, cross-species  
65 transmissions from three of more than forty non-human primate species harbouring SIVs gave rise  
66 to Human Immunodeficiency Virus (HIV) [1,2]. There are two types of the virus, HIV-1 and HIV-  
67 2, which are further subdivided into four and nine groups, respectively, each originating from an  
68 independent transmission from great apes or monkeys. HIV-1 group M (major), which is  
69 responsible for at least 95% of all infections, as well as HIV-1 group N that has only been detected  
70 in about 20 individuals, originated from SIVcpz infecting chimpanzees [1,2]. SIVcpz was also  
71 transmitted from chimpanzees to gorillas, which passed SIVgor to humans on two occasions and  
72 gave rise to epidemic HIV-1 group O strains and the very rare group P of HIV-1 [2].

73 It is plausible that great apes and not monkeys have transmitted their viruses to humans since  
74 these *Homininae* are genetically closely related. However, there is a striking exception. SIVsmm  
75 infecting sooty mangabeys has been transmitted to humans on at least nine independent occasions  
76 giving rise to HIV-2 groups A-I [2,3]. However, only two of the nine groups of HIV-2 (A and B)  
77 have spread significantly in the human population and are responsible for about one to two million  
78 infections, mostly in West Africa [4]. SIVsmm has also been accidentally transmitted to rhesus  
79 macaques in primate centres and SIVmac infection of Asian macaques became a valuable animal  
80 model for HIV pathogenesis and AIDS in humans [5].

81 Several factors help to explain why SIVsmm from sooty mangabeys frequently crossed the  
82 species barrier to humans, while no other SIVs infecting numerous monkey species in sub-Saharan  
83 Africa have been detected in humans. SIVsmm is highly prevalent in sooty mangabeys and these  
84 monkeys are kept as household pets or hunted for bushmeat suggesting frequent viral exposure of

85 humans. In addition, SIVsmm isolates replicate in human PBMCs [6] and seem capable of  
86 counteracting some major human restriction factors without adaptation [7]. For example, the  
87 SIVsmm Env is active against human tetherin [8,9] and the SIVsmm Vpx protein counteracts the  
88 human ortholog of SAMHD1 [10] as well as the human HUSH complex [11]. In addition, human  
89 SERINC5 does not pose a barrier to zoonotic transmission as it is counteracted by SIVsmm Nef  
90 [12]. Altogether, SIVsmm accessory proteins seem to be more active against human restriction  
91 factors than those of SIVs infecting other monkey species.

92 Apolipoprotein B mRNA editing enzyme catalytic polypeptide-like 3 (APOBEC3; A3)  
93 represent perhaps the best studied and most relevant antiretroviral restriction factors [13,14]. These  
94 cellular cytidine deaminases bind viral RNA, are encapsidated into newly formed virions and  
95 impair viral infectivity by inducing the formation of deleterious G-to-A hyper-mutations in the  
96 viral genome and by interfering with reverse transcription [15–17]. Humans possess seven A3  
97 proteins (A, B, C, D, F, G and H) that resulted from several gene duplications on chromosome 22  
98 [18]. It has been reported that all human A3 proteins, except A3A, have the capacity to suppress  
99 HIV-1 group M infectivity in CD4<sup>+</sup> T cells [19]. A3A may restrict HIV infectivity in monocyte  
100 derived cells [20,21]. However, A3B can only suppress HIV infectivity when expressed and  
101 encapsidated into HIV virions from 293T producer cells, which is not relevant *in vivo* where it is  
102 localized in the nucleus and unable to encapsidate into virions [22]. A3C is highly expressed in  
103 CD4<sup>+</sup> T cells, but hardly able to induce enough mutations in the HIV proviral DNA to affect  
104 infectivity [23]. Primate lentiviruses use their Vif protein to antagonize restriction by A3 proteins.  
105 All lentiviral Vif proteins interact with A3 proteins to recruit them to the Cullin 5/ElonginBC E3  
106 ubiquitin ligase complex for proteasomal degradation [15]. The importance of this viral  
107 counteraction mechanism is evident from the fact that Vif is also found in feline immunodeficiency

108 viruses (FIVs) and already present in prosimian lentiviruses that entered the germline of lemurs  
109 about 4 million year ago [17,24]. In addition, a functional *vif* gene is critical for replication of  
110 SIVmac in rhesus macaques [25]. The ability of primate lentiviral Vif proteins to promote  
111 infectivity is species-specific [26]. Notably, it has been shown that the recombination events  
112 between SIVs originating from small monkeys that lead to the emergence of SIVcpz in  
113 chimpanzees resulted in a functional Vif protein at the cost of the accessory *vpx* gene [13]. The  
114 adaptive changes allowing the precursors of HIV-1 to counteract A3 proteins and other restricting  
115 factors after crossing the species barriers first from monkeys to chimpanzees and later from great  
116 apes to humans have been well studied [13,27–30].

117 It has been reported that SIVsmm Vif proteins show some activity against APOBEC3G from  
118 many species including the human homolog [29]. However, counteraction of human A3 proteins  
119 may be imperfect since epidemic HIV-2 strains show on average more APOBEC3G/F-induced  
120 hyper-mutations than HIV-1 isolates [31]. It is incompletely understood how susceptible SIVsmm  
121 is to IFN-inducible factors in human cells and whether their Vif proteins acquired adaptive changes  
122 allowing more effective counteraction of A3 proteins following zoonotic transmission to humans.  
123 Here, we show that SIVsmm has lower replication fitness than HIV-2 in primary human cells,  
124 especially in the presence of IFN. We further demonstrate that SIVsmm Vifs show some activity  
125 against human ABOBEC3 proteins but HIV-2 Vifs acquired adaptive changes to efficiently  
126 overcome this barrier in the human host.

## 127 **RESULTS**

### 128 **Replication fitness and IFN $\alpha$ sensitivity of HIV-1, HIV-2 and SIVsmm in CD4+ T cells**

129 Primary SIVsmm isolates are capable of replicating in human cells without adaptive changes [6].  
130 However, the replication kinetics of SIVsmm and HIV-2 in human CD4+ T cells and their  
131 susceptibility to the inhibitory effects of type I IFNs have not been directly compared. Thus, it  
132 remained largely unclear whether HIV-2 acquired increased replication fitness in human cells and  
133 reduced susceptibility to IFN-inducible antiviral factors during adaptation to the human host. To  
134 address this, we analyzed a panel of five infectious molecular clones (IMCs) representing epidemic  
135 (A and CRF01\_AB) groups of HIV-2, as well as six SIVsmm IMCs representing five different  
136 lineages (Table S1). For comparison, we examined four transmitted-founder (TF) HIV-1 strains  
137 [32,33] and the T-cell line adapted HIV-1 NL4-3 IMC, as well as SIVmac239 [34], a macaque-  
138 passaged derivative of SIVsmm, that has been commonly used in non-human primate studies on  
139 viral pathogenesis and vaccine development.

140 To determine the replicative capacity of HIV-1, HIV-2 and SIVsmm, we infected activated  
141 human peripheral blood mononuclear cells (PBMCs) with virus stocks normalized for reverse  
142 transcriptase (RT) activity and determined the infectious virus yield in culture supernatants at  
143 various days post-infection by TZM-bl reporter cell infection assay. All ten HIV-1 and HIV-2  
144 IMCs replicated efficiently in human PBMCs (Figure 1A). On average, the HIV-2 IMCs achieved  
145 lower infectious virus yields than HIV-1 IMCs (Figure 1B). However, the HIV-2 GH123 construct  
146 derived from an AIDS patient from Ghana [35] displayed surprisingly rapid kinetics and achieved  
147 ~10-fold higher infectious virus yields than the remaining four HIV-2 IMCs (Figure 1A). Notably,  
148 this HIV-2 strain has a truncated gp41 cytoplasmic tail. The RT activities in the supernatant of  
149 PBMCs infected with HIV-2 GH123 were similar to those obtained for other HIV-2 IMCs (data

150 not shown) indicating that the gp41 truncation increases viral infectivity for TZM-bl reporter cells  
151 as previously reported for SIVmac239 [36] and HIV-2 ST in SupT1 cells [37].

152 The replicative capacity of the SIV constructs in primary human cells was more variable  
153 compared to HIV-1 and HIV-2. The SIVmac239 and SIVsmm PG strains replicated as efficiently  
154 as HIV-1 strains (Figure 1A). Notably, SIVmac239 was passaged in human HUT-78 cells [34],  
155 and SIVsmm PG was passaged in human PBMCs and CEMx174 cells after isolation from lymph  
156 nodes of an infected pig-tailed macaque [38]. Thus, their effective replication may reflect  
157 adaptation for growth in human cells. The remaining SIVsmm clones represent five divergent  
158 lineages [39] and were obtained after passage in rhesus macaques that are genetically closely  
159 related to sooty mangabeys (Table S1) [6]. Like HIV-2, the SIVsmm lineage 1 (L1) strain  
160 replicated efficiently in human PBMCs, while the SIVsmm L5 construct showed only marginal  
161 levels of replication (Figure 1A). The remaining three IMCs (L2, L3 and L4) displayed a  
162 phenotype intermediate between SIVsmm L1 and L5. On average, the HIV-1 IMCs replicated with  
163 the highest efficiency in human CD4<sup>+</sup> T cells and HIV-2 clones showed more rapid replication  
164 kinetics than SIVsmm IMCs (Figure 1B).

165 Type I IFN induces numerous antiviral factors that are frequently counteracted by primate  
166 lentiviruses in a species-specific manner [40–42]. Previous studies showed that SIVsmm strains  
167 are capable of antagonizing several major human restriction factors [7]. It is poorly understood,  
168 however, whether they counteract the antiviral effects of IFN in primary human T cells as  
169 effectively as HIV-2. To address this, we infected activated human PBMCs in the presence of IFN-  
170  $\alpha$ . We found that treatment with IFN- $\alpha$  (500 U/ml) reduced infectious yield of HIV-1 about 2-fold  
171 and resulted in moderately delayed replication kinetics (Figure 1C). In comparison, only the HIV-  
172 2 GH123 and ROD10 strains replicated efficiently in the presence of IFN- $\alpha$ , while infectious virus



173 production was grossly impaired for 7312A and ST and essentially absent for KR (Figure 1C). The  
174 inhibitory effect of IFN- $\alpha$  on SIVsmm replication was even more severe and only the SIVsmm PG  
175 and L1 clones replicated to clearly detectable levels (Figure 1C). The SIVmac239 IMC that  
176 showed the highest infectious virus yield in the absence of IFN- $\alpha$  was almost completely  
177 suppressed in its presence. Altogether, the results showed that HIV-1 IMCs display higher  
178 replication fitness in primary human CD4<sup>+</sup> T cells than HIV-2 IMCs in both the absence (Figure  
179 1B) and presence of IFN- $\alpha$  (Figure 1D). On average, however, HIV-2 was significantly more  
180 competent for replication in primary human cells than SIVsmm, indicating significant adaptation  
181 for effective spread as well as counteraction of IFN-inducible innate defense factors in the human  
182 host.

### 183 **HIV-2 is less susceptible to inhibition by human APOBEC3 proteins than SIVsmm**

184 Our results indicated that during the emergence of HIV-2 from SIVsmm, the virus adapted to  
185 become more fit for replication in the human host. To define underlying mechanisms, we  
186 investigated the potential role of Vif-mediated antagonism of APOBEC3 proteins in the evolution  
187 of replication fitness in human cells in the SIVsmm/HIV-2 lineage. To verify the importance of  
188 Vif for effective viral replication, we generated *vif*-defective derivatives of six HIV and SIV IMCs.  
189 The *vif* defective HIV-1 NL4-3, CH077, CH058 as well as HIV-2 7312A constructs showed  
190 strongly delayed and severely attenuated replication kinetics in both the absence and presence of  
191 IFN- $\alpha$  (Figure 2A). A defective *vif* gene further impaired the already modest replication of  
192 SIVsmm L5. Unexpectedly, the *vif*-defective SIVmac239 construct showed higher levels of  
193 replication than *vif*-defective HIV-1 and HIV-2 IMCs in the absence of IFN- $\alpha$  (Figure 2A).  
194 Predictably, these analyses verified that functional Vif expression is required for effective  
195 lentiviral replication in primary human T cells.

196 To determine possible differences in the susceptibility of HIV-1, HIV-2 and SIVsmm to various  
197 human APOBEC3 proteins, we measured infectious virus yield from HEK293T cells following  
198 cotransfection of the proviral constructs with expression vectors for various APOBEC3s or an  
199 empty control vector (Figures 2B, S1). This system was chosen due to the reported lack of or only  
200 low expression of endogenous APOBEC3 genes in this cell line. In agreement with these reports,  
201 we observed no infectivity defects of *vif*\* mutant IMCs in the absence of APOBEC3  
202 overexpression (Figure S1). All five APOBEC3 proteins analyzed (C, D, F, G and H haplotype II)  
203 inhibited infectious HIV-1 production to some extent with average efficiencies ranging from 20%  
204 (D) to 60% (H) (Figure 2B). As expected, *vif*-defective HIV and SIV IMCs were usually more  
205 susceptible to APOBEC3 inhibition than the parental WT viruses. However, NL4-3 Vif was less  
206 effective in counteracting A3G than the Vif proteins of the primary HIV-1 CH058 strain. In  
207 addition, the effects of intact *vif* genes on infectious virus yield were usually modest in the case of  
208 A3C, A3D and A3F, most likely due to both relatively low antiviral activity and ineffective  
209 counteraction by Vif. Surprisingly, the *vif*-defective HIV-2 7312A construct was largely resistant  
210 to all APOBEC3 proteins. In contrast, lack of Vif function generally increased the susceptibility  
211 of SIVsmm L5 and SIVmac239 especially to human A3F, A3G and A3H (Figure 2B). Altogether,  
212 the susceptibility of HIV-2 strains did not differ significantly from those of HIV-1 for APOBEC  
213 3C, 3D, 3F and 3G (Figure 2B). Unexpectedly, HIV-2 IMCs were less sensitive to inhibition by  
214 A3H than HIV-1 (Figure 2B, bottom). Most notably, SIVsmm IMCs were on average significantly  
215 more susceptible to inhibition by human A3D, A3F, A3G and A3H than HIV-2 (Figure 2B). In  
216 contrast, SIVmac239 was largely resistant to all human APOBEC3 proteins investigated.  
217 Altogether, these results suggest that HIV-2 strains acquired changes increasing their ability to  
218 counteract human APOBEC3D, F, G and H proteins after zoonotic transmission of SIVsmm from

219 sooty mangabeys to humans. Unexpectedly, *vif*-defective HIV and SIV IMCs differ substantially  
220 in their susceptibility to human APOBEC3 proteins. Notably, these differences were not just due  
221 to differences in the absolute levels of infectious virus production (Figure S1). Thus, although Vif  
222 function clearly plays a key role in primate lentiviral susceptibility to APOBEC3 proteins,  
223 alternative mechanisms also seem to be involved.

#### 224 **HIV-2 counteracts human APOBEC3 proteins more efficiently than SIVsmm**

225 To determine whether the reduced susceptibility of HIV-2 to human A3D, A3F, A3G and A3H  
226 relative to SIVsmm is associated with differences in the ability of the respective Vif proteins to  
227 induce APOBEC3 degradation, we performed immunoblot analyses. We cotransfected HEK293T  
228 cells with proviral HIV-1, HIV-2 or SIV and APOBEC expression constructs and measured the  
229 levels of viral and APOBEC3 proteins in the cellular extracts and culture supernatants as well as  
230 the corresponding infectious virus yields. HIV-1, HIV-2 and SIVsmm constructs are highly  
231 divergent and there are relatively few reagents specifically designed to study the latter two. Thus,  
232 antibody recognition of the p24 and p27 capsid antigens varied. Therefore, we focused on the  
233 levels of cell-associated APOBEC3 antigens normalized for cellular GAPDH or tubulin levels for  
234 quantitative comparisons. In agreement with the results on infectious virus yields (Figure 2B), the  
235 levels of cell-associated A3D, A3F, A3G and A3H were significantly lower in cells transfected  
236 with HIV-2 constructs compared to those that received SIVsmm (Figures 3A, 3B, S2A). As  
237 expected, lack of intact *vif* genes increased APOBEC3 steady-state expression levels. It came as  
238 surprise, however, that the ability of HIV-1 IMCs to degrade A3D, A3F, A3G and A3H proteins  
239 varied substantially and was usually less effective compared to HIV-2 IMCs (Figure S2A).  
240 Altogether, the levels of A3F and A3G expression relative to GAPDH correlated with the  
241 infectious virus yields in the cell culture supernatant albeit with substantial variation (Figure 3A,

242 3B, right panels). In agreement with previous data [43], the levels of APOBEC3 proteins in cellular  
243 extract did not always match those detectable in the viral supernatants (Figures 3A, 3B, S2A).  
244 Thus, while Vif-mediated degradation and cellular expression levels of APOBEC3 proteins are a  
245 major determinant of infectious virus production, not all HIV-1, HIV-2 and SIV constructs seem  
246 to be equally susceptible to the inhibitory effect of these APOBEC3 proteins. In addition, our  
247 results add to the evidence that Vif might also counteract APOBEC3 proteins by degradation-  
248 independent activities [44].

249 Human A3F was detected at relatively high levels in SIVsmm particles and not efficiently  
250 counteracted by SIVsmm Vif (Figure 3A). To investigate this further, we cotransfected 293T cells  
251 with constant quantities of A3F or A3G expression plasmids and increasing amounts of HIV or  
252 SIV Vif constructs. All Vif proteins analyzed induced efficient degradation of A3G, while none of  
253 them efficiently counteracted A3F at high expression levels (Figure S2B). To detect more subtle  
254 activities of HIV and SIV Vif proteins in degrading human A3F, we performed the experiment  
255 using a 5-fold lower dose of A3F expression constructs. Under these conditions, a dose-dependent  
256 reduction of A3F expression was detectable for all Vif proteins examined (Figure 3C). In  
257 agreement with the results obtained using the proviral constructs (Figure 3A), the HIV-1 CH077  
258 and HIV-2 7312A Vifs degraded A3F more efficiently than the SIVsmm Vifs (Figure 3C).  
259 Altogether, these results show that HIV-2 acquired an increased ability to degrade various human  
260 APOBEC3 proteins and further suggest that especially A3F might represent a barrier to successful  
261 spread of SIVsmm after zoonotic transmission.

### 262 **HIV-2 and SIVsmm show species-specific differences in A3 antagonism**

263 To further examine the species-specific evolution of APOBEC3 antagonism in the HIV-  
264 2/SIVsmm/mac lineage, we compared the susceptibility of HIV-2 and SIVsmm to inhibition by

265 human and monkey-derived A3F, A3G and A3H orthologues. Two A3F alleles, each, were  
266 available from sooty mangabeys and macaques. The two SMM A3F alleles differed in four amino  
267 acid residues from one another, in 14 residues from the macaque homologue and in ~50 residues  
268 from the human version (Figure 4A). Most variations did not fall within previously proposed active  
269 site residues, and the two Zinc-coordinating Cys residues as well as the catalytic Glu residues are  
270 generally conserved. Functional analyses showed that HIV-1 CH077 efficiently antagonizes  
271 human and sooty mangabey A3Fs in a Vif-dependent manner but is inhibited by ~50% by the  
272 macaque orthologues (Figure 4B, 4C). In comparison, the HIV-2 ST, ROD and 7312A IMCs as  
273 well as SIVmac239 were resistant to A3F orthologues from all three species investigated (Figure  
274 4B). With the single exception of SIVsmm L5 that shows unique variations at amino acid positions  
275 93, 134, 156 and 168 of Vif, all four SIVsmm IMCs analyzed were highly susceptible to human  
276 A3F but resistant to inhibition by the sooty mangabey and macaque A3Fs (Figure 4B). On average,  
277 HIV-2 was significantly less sensitive to human A3F than SIVsmm (Figure 4C) suggesting human-  
278 specific adaptation or zoonotic transmission of a pre-adapted, less susceptible SIVsmm variant.

279 For A3G, three macaque orthologues showing variations at 12 amino acid positions and  
280 differing in ~90 residues from the human orthologue were available for analysis (Figure 5A). Most  
281 notably, the variation of Y59 to L59/R60 was previously reported to confer resistance to SIVsmm  
282 Vif [30]. Predictably, the Vif protein of HIV-1 CH077 efficiently counteracted human A3G  
283 (Figure 5B). The three macaque A3G orthologues showed moderate activity against HIV-1 CH077  
284 and were not efficiently counteracted by its Vif protein (Figure 5B, 5C). On average, the SIVsmm  
285 strains were slightly more susceptible to the human than to the macaque orthologues, while the  
286 opposite was observed for the HIV-2 IMCs (Figure 5C). However, these differences were modest,  
287 which agrees with previous data suggesting that A3G does not represent an effective barrier against

288 zoonotic transmission of SIVsmm [29]. SIVsmm L2 was susceptible to the MAC A3G(LR)  
289 orthologue but resistant to the remaining two macaque variants (Figure 5B). This agrees with  
290 previous data showing that SIVsmm is sensitive to A3G(LR) because its Vif protein contains a  
291 Gly at amino acid position 17 and that a G17E substitution renders SIVmac resistant to this A3G  
292 variant [30]. The SIVsmm IMCs analyzed in the present study were obtained after passage in  
293 macaques (Table S1), which may explain why most of their Vif proteins contained E17 and were  
294 resistant to A3G(LR). Notably, HIV-2 strains were less sensitive to inhibition by the macaque  
295 A3G(LR) variant than SIVsmm L2 although their Vif proteins generally contain a Gly at position  
296 17.

297 Finally, we examined the susceptibility of the IMCs to inhibition by human and sooty mangabey  
298 A3H, which differ in 28 amino acid positions and the presence of the last exon (Figure 6A). In  
299 agreement with published data [45], HIV-1 counteracted human but not sooty mangabey A3H  
300 (Figure 6B). In contrast, HIV-2, SIVsmm and SIVmac were generally resistant against both human  
301 and sooty mangabey A3H (Figure 6B, 6C). Altogether, our results support that A3G and A3H do  
302 not represent significant barriers to successful cross-species transmission of SIVsmm to humans.  
303 In contrast, human A3F displayed substantially higher activity against SIVsmm than against HIV-  
304 2, suggesting specific adaptation to this antiviral factor during viral adaptation to humans.

### 305 **Role of an R128T variation in A3F-mediated inhibition of HIV-1, HIV-2 and SIVsmm**

306 It has been shown that a single D128K variation in the A3G N-terminal domain plays a key role  
307 in the species-specificity of its counteraction by HIV-1 and SIVagm Vif proteins [26,46,47].  
308 Although HIV-1 Vif binds to human A3F in the C-terminal domain on a dispersed interface  
309 involving the 11 amino acids from position 255 to 324, it has been reported that HIV-2 Vif interacts  
310 with the A3F in the N-terminal domain, specifically amino acids 140-144 [48,49]. However, these

311 residues are generally conserved in A3Fs from human, sooty mangabey, and macaque. In case of  
312 A3G and A3H HIV-1, Vif interacts with an amino acid on loop 7, D128 (A3G) or D121 (A3H),  
313 respectively. Notably, human A3F differs by a T128R change from sooty mangabey and macaque  
314 A3Fs (Figure 4A). To determine whether this loop 7 amino acid substitution contributes to the  
315 species-specificity of Vif antagonism, we introduced a R128T mutation in human A3F and the  
316 reverse T128R change in sooty mangabey A3F. We found that the R128T change increased the  
317 antiviral activity of human A3F against HIV-1 CH077 (Figure 7A) and HIV-2 (Figure 7B), while  
318 the reverse change in sooty mangabey A3F had no significant effect on its antiviral activity. Thus,  
319 R128T renders human A3F less sensitive to antagonism by HIV-1 and HIV-2 Vif proteins. Human  
320 A3F and the T128R mutant sooty mangabey A3F were equally effective against SIVsmm L2  
321 (Figure 7C). In comparison, wildtype sooty mangabey A3F showed the lowest and the R128T  
322 human A3F variant the highest activity against SIVsmm L2. Thus, the T128R substitution in sooty  
323 mangabey A3F seems to reduce its susceptibility to counteraction by SIVsmm Vif although the  
324 differences were modest. Western blot analyses showed that Vif efficiently reduced the levels of  
325 A3F in cellular extracts as well as in HIV-1, HIV-2 and (less efficiently) SIVsmm virions (Figure  
326 7, right panels). Our results suggest that *vif*-defective HIV-2 7312 infection results in significant  
327 reduction of A3F expression in the cells while this was not observed with *vif*-defective HIV-1 and  
328 SIVsmm constructs. This result agrees with our finding that *vif*-defective HIV-2 7312 is less  
329 sensitive to A3F and A3G inhibition than HIV-1 and SIVsmm constructs lacking intact *vif* genes  
330 (Figure 3). Usually, only modest differences between wildtype and mutant human and sooty  
331 mangabey A3F levels were observed in cells transduced with the HIV-1, HIV-2 or SIVsmm  
332 proviral construct, although the Western blot confirmed that the R128T substitution increased A3F  
333 steady-state expression levels in cells transfected with wildtype HIV-2 7312 (Figure 7B).



334 **Changes of Y45H and T84S increase the activity of SIV<sub>smm</sub> Vif against human APOBEC3F**

335 To identify variations that might affect the ability of Vif to counteract APOBEC3F in a species-  
336 specific manner, we aligned the amino acid sequences of the HIV-2, SIV<sub>smm</sub> and SIV<sub>mac</sub> IMCs  
337 analyzed in the present study. In order to focus on those that would be representative of human-  
338 specific adaptations, we also compared them and other HIV-2 *vif* sequences found in the database  
339 to primary SIV<sub>smm</sub> consensus sequence. Nucleotide variation analysis of the HIV-2 *vif* genes,  
340 performed using Synonymous Non-synonymous Analysis Program (SNAP), identified multiple  
341 positions (shown as red peaks on the upper panel above the alignment in Figure 8A) that were  
342 subject to high rates of non-synonymous changes during the evolution of HIV-2. Several of these  
343 mutations, such as H28Y, N32R and T84S, showed high, species-specific conservation and were  
344 representative of most HIV-2 group A/B and SIV<sub>smm</sub> isolates (Figure 8B, S3). These features  
345 indicate a likely relevant role in host adaptation of HIV-2 (Figure 8B). Notably, Y28 dominated in  
346 both HIV-2 and SIV<sub>mac</sub>, while most SIV<sub>smm</sub> Vif proteins contained H28. Vif proteins of the  
347 extremely rare HIV-2 group F, G, H and I strains showed various amino acids at positions 28, 32  
348 and 84 (Figure S3). To determine their functional impact, we introduced substitutions of H28Y  
349 and N32R (individually and in combination) into the SIV<sub>smm</sub> L2 IMC. In addition, we mutated  
350 residue 45 lying in one of the most conserved regions between SIV<sub>smm</sub> and HIV-2 (Figure 8A),  
351 from Y found in the L2 and L4 Vifs to H present in most SIV<sub>smm</sub> and HIV-2 Vif proteins (Figure  
352 8B). We included this change because it is in close proximity to P43H44 reported to play a role in  
353 the interaction of Vif with APOBEC3F [50].

354 For functional analyses, we cotransfected HEK293T cells with the wildtype and mutant proviral  
355 SIV<sub>smm</sub> L2 constructs and various amounts of sooty mangabey or human A3F expression plasmid  
356 and determined infectious virus yield by TZM-bl infection assay (Figure S4). We found that all



357 amino acid changes increased the susceptibility of SIVsmm to sooty mangabey A3F, resulting in  
358 a phenotype intermediate between wildtype and *vif*-defective SIVsmm (Figure 8C). In comparison,  
359 the Y45H substitution alone or in combination with changes at positions 28 and/or 32 rendered  
360 SIVsmm less susceptible to human A3F (Figure 8D). The species-specificity of this effect came  
361 as surprise since 45H dominates in both SIVsmm as well as HIV-2 Vif proteins (Figure 8B).

362 To further determine the effect of the T85S and Y45H changes on the ability of SIVsmm Vif  
363 to antagonize A3F, we performed Western blot and infectious virus production assays (Figure 9).  
364 We found that both changes increased infectious virus yield in the presence of human A3F from  
365 ~60% to 80% but did not further enhance the already effective counteraction of sooty mangabey  
366 A3F (Figure 9A). Western blot analyses indicated that the T85S and Y45H changes do not  
367 markedly affect the ability of SIVsmm Vif to induce SMM A3F degradation. For comparison, we  
368 used the HIV-2 7312 construct and confirmed that it is hardly susceptible to A3F inhibition, even  
369 in the absence of Vif (Figure 9A). Thus, HIV-2 may also have evolved Vif-independent  
370 mechanisms to avoid A3F restriction.

### 371 **The T84S change in Vif accelerates SIVsmm replication in human PBMCs**

372 To examine the impact of the identified amino acid variations in Vif on the replication fitness of  
373 SIVsmm in human cells, we monitored wt and *vif* mutant infectious virus production in human  
374 PBMCs (derived from four different donors) infected with wt and *vif* mutant SIVsmm IMCs over  
375 a period of 12 days. For comparison, we included the HIV-2 7312 IMC in the analyses. As  
376 expected, the wildtype SIVsmm and HIV-2 IMCs replicated efficiently in human cells whereas  
377 the *vif*-defective derivatives did not yield infectious virus (Figure 10A). All five mutant SIVsmm  
378 constructs exhibited similar levels of virus production as the wildtype virus. However, the T84S  
379 substitution in Vif generally resulted in accelerated replication kinetics (Figure 10B) and slightly

380 higher total virus production (Figure 10C). In comparison, the reverse S84T change did not alter  
381 the replicative fitness of HIV-2 7312 in human CD4<sup>+</sup> T cells (Figure 10A). Unexpectedly, the  
382 H28Y, H28Y/Y45H and H28Y/N32R/Y45H changes that render SIVsmm Vif more similar to  
383 HIV-2 Vifs all moderately but significantly reduced infectious virus production in SIVsmm-  
384 infected human PBMCs, while the individual Y45H change had no significant effect (Figure 10C).  
385 Altogether, these results show that the consistent amino acid differences between SIVsmm and  
386 HIV-2 Vif proteins at positions 28 and 32 have a slightly negative effect on viral replication fitness  
387 but the T84S change significantly accelerated replication kinetics in primary human PBMCs.

## 388 **DISCUSSION**

389 It has been shown that primary SIVsmm strains replicate in primary human cells [6] and are  
390 capable of counteracting some major human restriction factors, including APOBEC3 proteins  
391 without prior adaptation [29]. However, it remained unclear whether HIV-2 acquired increased  
392 replication fitness and activity against human APOBEC3 proteins during spread in humans. Here,  
393 we show that SIVsmm IMCs differ substantially in their ability to spread in human PBMCs but  
394 are, on average, less fit for replication than HIV-2 and (even more) HIV-1. Notably, even those  
395 SIVsmm strains showing the highest levels of replication were almost fully inhibited by type I IFN  
396 treatment of human PBMCs. Our results clearly show that epidemic HIV-2 group A strains evolved  
397 increased ability to counteract or evade the human versions of antiretroviral restriction factors  
398 upon zoonotic transmission. Subsequent analyses revealed that the HIV-2 IMCs were on average  
399 less sensitive to inhibition by four of the five APOBEC3 family members investigated (i.e. A3D,  
400 A3F, A3G and A3H) than SIVsmm. Functional analyses confirmed that HIV-2 Vif proteins  
401 degrade human APOBEC3 proteins more efficiently than those of SIVsmm. Thus, our data support  
402 that adaptations in Vif that increase its ability to counteract human APOBEC3 proteins were  
403 important for the epidemic spread of HIV-2.

404 Based on previous data using uncloned viral strains [51], we expected HIV-1 to replicate to  
405 higher titers in human PBMC than HIV-2 (Figure 1). However, we did not expect that HIV-1 IMCs  
406 were on average less efficient in degrading human APOBEC3 proteins than HIV-2 (Figure S2A).  
407 Only overexpression of A3H reduced the infectious virus yield of HIV-1 more efficiently than that  
408 of HIV-2 (Figure 2B). Altogether, these results agree with previous findings that HIV-1 Vif  
409 proteins counteract ABOBEC3 proteins by several degradation-dependent and independent  
410 mechanisms [52,53]. It will be interesting to further examine whether the increased ability of HIV-

411 2 to induce degradation of APOBEC3 proteins may compensate for the lack of other counteracting  
412 mechanisms exerted by HIV-1.

413 One limitation of our study is that the HIV-1, HIV-2 and SIVsmm IMCs were generated and  
414 obtained in different ways. Except for NL4-3, all HIV-1 IMCs represented TF viruses directly  
415 obtained from patient plasma (Table S1). TF HIV-1 strains are usually resistant to the inhibitory  
416 effects of IFN-I and efficient in counteracting antiviral restriction factors [33,54]. This explains  
417 their relatively efficient replication in the presence of IFN (Figure 1C) and further suggests that  
418 the above-mentioned lower activity in degradation of A3 proteins compared to HIV-2 is a common  
419 feature of primary HIV-1 strains. With the exception of HIV-2 7312A, all HIV-2 IMCs, as well as  
420 two of the seven SIV clones (PG and mac239) were obtained after passage in human cell lines and  
421 may not be fully representative of primary HIV-2 and SIVsmm or SIVmac strains. Preadaptation  
422 to human cell helps to explain why SIVsmm PG and SIVmac239 replicated efficiently in human  
423 PBMCs, at least in the absence of IFN (Figure 1). In contrast, the SIVsmm L1 to L5 IMCs have  
424 never been propagated in human cells but were obtained after passage in rhesus macaques (Table  
425 1S) [39,55]. Adaptation to macaques most likely explains why the Vif proteins of most of these  
426 SIVsmm IMCs contain a G17E substitution allowing them to counteract the MAC(LR) variant of  
427 A3G [30]. The exception was SIVsmm L2, which contains G17 like the Vif proteins of primary  
428 sooty mangabey viruses, and was thus selected for mutational analyses. Notably, with the  
429 exception of being sensitive to the MAC(LR) variant of A3G, the properties of SIVsmm L2 and  
430 its Vif protein were highly similar to those of the remaining four lineages of SIVsmm. Both sooty  
431 mangabey and rhesus macaques belong to the *Cercopithecinae* subfamily of Old World monkeys  
432 and are genetically closely related. Thus, passage in the latter did most likely not alter most  
433 properties of SIVsmm and still allowed meaningful comparison to HIV-2 IMCs.

434 Four of the five HIV-2 IMC analyzed belong to group A that has spread more efficiently in  
435 humans than all remaining groups of HIV-2, albeit much less effectively compared to pandemic  
436 HIV-1 group M strains. Notably, some of the consistent amino acid variations between HIV-2 A  
437 strains and SIVsmm are shared by group B viruses but not by group F and G HIV-1 Vif sequences  
438 available in the Los Alamos HIV sequence data base. Thus, it is tempting to speculate that  
439 adaptation to the human host might have been a prerequisite for the epidemic spread of group A  
440 and B HIV-2 strains, while the remaining groups, which were usually detected in only single  
441 individuals, have adapted less well to their new human host.

442 Many previous studies have been performed using Vif expression constructs while most  
443 experiments performed in the present study involved infectious molecular clones of HIV-1, HIV-  
444 2 and SIVsmm. Utilization of highly diverse primate lentiviruses has the limitation that  
445 quantitative comparisons are difficult because the viral antigens are highly divergent. However,  
446 they are more relevant for the *in vivo* situation and may reveal whether not only Vif function but  
447 also other features may contribute to viral susceptibility to inhibition by APOBEC3 proteins. For  
448 example, the *vif*-defective HIV-2 7312A IMC was surprisingly resistant to human APOBEC3  
449 proteins (Figure 2B). Our results suggest that different HIV-1, HIV-2 and SIVsmm strains differ  
450 substantially in APOBEC3 sensitivity irrespective of Vif function. In addition, our data agree with  
451 the evidence that Vif may also counteract APOBEC3 proteins by degradation-independent  
452 mechanisms [43,56].

453 Although four of the seven human APOBEC3 proteins (APOBEC3D, G, F, and H) can restrict  
454 replication of HIV-1, APOBEC3G and APOBEC3H are considered to have higher restriction  
455 activity than APOBEC3F or APOBEC3D. Surprisingly, for SIVsmm, the APOBEC3F restricted  
456 infectious virion production approximately 2-fold more than APOBEC3G, which is opposite to

457 what is observed for HIV-1 [57]. Once an APOBEC3 has bypassed Vif, activity in a virion is  
458 determined by APOBEC3 processivity, or ability to deaminate multiple cytosines in a single  
459 enzyme/substrate encounter and ability to physically inhibit the reverse transcriptase [58]. In the  
460 absence of Vif, APOBEC3G can carry out both activities efficiently, whereas APOBEC3F induces  
461 fewer mutations, but can inhibit HIV-1 reverse transcriptase more than APOBEC3G [59,60].  
462 APOBEC3G deamination is also inhibited by physically binding to encapsidated Vif [61,62]. For  
463 SIVsmm, the data show that human APOBEC3F was better at resisting Vif-mediated degradation  
464 than APOBEC3G so that more was left in cells and thus in virions to exert the restriction activity.  
465 Thus, even though biochemically APOBEC3F has been characterized as less active, these  
466 activities were largely observed in the absence of Vif. Here, in the presence of Vif, the APOBEC3F  
467 was more resistant and thus constituted the main transmission barrier, despite less efficient  
468 biochemical activity under ideal conditions.

469 In the present study, we confirmed that SIVsmm is preadapted for growth in human cells and  
470 capable of counteracting human APOBEC3 proteins. We also show, however, the SIVsmm strains  
471 that were transmitted to humans were initially most likely highly sensitive to IFN and apparently  
472 acquired adaptive changes for epidemic spread in humans, including increased capability to  
473 counteract APOBEC3D, F, G and H. We found that a T84S variation in Vif is relevant for species-  
474 specific counteraction by HIV-2 and SIVsmm but altogether the determinants seem to be complex.  
475 One open question is why HIV-2 A is still less fit for replication and spread in humans (compared  
476 to HIV-1) although it crossed the species-barrier about a century ago and its Vif proteins seem to  
477 be highly effective at degrading human APOBEC3 proteins.

## 478 **Materials and Methods**

479 **Ethical statement.** Experiments involving human blood were reviewed and approved by the  
480 Institutional Review Board (i.e. the Ethics Committee of Ulm University). Individuals and/or their  
481 legal guardians provided written informed consent prior to donating blood. All human-derived  
482 samples were anonymized before use. The use of established cell lines (HEK293T, TZM-bl,) did  
483 not require the approval of the Institutional Review Board.

484 **Cell lines.** Human Embryonic Kidney (HEK) 293T cells (obtained from the American Type  
485 Culture Collection (ATCC) and TZM-bl reporter cells (kindly provided by Drs. Kappes and Wu  
486 and Tranzyme Inc. through the NIH AIDS Reagent Program) were cultured in Dulbecco's  
487 Modified Eagle Medium (DMEM) supplemented with 10% heat-inactivated fetal calf serum  
488 (FCS), 2 mM L-glutamine, 100 units/ml penicillin and 100 µg/ml streptomycin. TZM-bl cells  
489 express CD4, CCR5 and CXCR4 and contain the β-galactosidase genes under the control of the  
490 HIV-1 promoter [63,64].

491 **Expression vectors.** Infectious molecular clones of HIV-1, HIV-2 and SIVsmm were described  
492 before (summarized in Table S1). Human APOBEC3C, D, F, G and H (haplotype II) expression  
493 vectors were obtained from NIH AIDS Reagent and subcloned into a pcDNA expression vector  
494 containing a C-terminal HA-tag as reported [57,65]. pcDNA3.2/V5-DEST based macaque and  
495 sooty mangabey APOBEC3F constructs containing a C-terminal V5-tag were cloned via the  
496 Gateway system. Monkey cDNA was extracted from archival B-cells generated from animals  
497 housed at the New England Primate Research Center (NEPRC), and the coding sequences were  
498 amplified with primers that introduced an optimal **Kozak sequence** at the 5' beginning of the  
499 APOBEC3F ORF (forward primer: **CAC CAT GAA GCCTCA CTT CAG AAA CAC AGT**

500 GGA GCG AAT G; reverse primer: CTC GAG AAT CTC CTG CAG CTT GC). Rhesus  
501 macaque A3G and sooty mangabey A3H expression constructs have been described [30,66].

502 Generation of mutant HIV and SIV IMCs. The Vif-deficient versions of HIV-1 NL4-3, HIV-1  
503 CH077, HIV-1 CH058, HIV-2 AB 7312A, SIV<sub>smm</sub> L2. RM136, SIV<sub>smm</sub> L5.DE28 and  
504 SIV<sub>mac239</sub> IMCs were generated by introducing 2 stop codons directly after the end of the *pol/vif*  
505 overlapping reading frame. Mutations inducing amino acid substitutions in the *vif* region of  
506 infectious molecular clones or in the APOBEC3 expression constructs were introduced using Q5  
507 site-directed mutagenesis kit (NEB). The presence of the desired mutations was confirmed by  
508 Sanger sequencing.

509 **PBMC isolation and stimulation.** Peripheral blood mononuclear cells (PBMCs) from healthy  
510 human donors were isolated using lymphocyte separation medium (Biocoll separating solution;  
511 Biochrom). Cells were cultured in RPMI 1640 medium supplemented with 10% FCS, 2 mM  
512 glutamine, streptomycin/penicillin (Gibco) and IL-2 (10 ng/ml) (Miltenyi Biotec). PBMCs were  
513 stimulated for 3 days with 2 µg/ml PHA and if indicated, with 500u/ml IFN $\alpha$  (PBL Assay Science)  
514 starting 24h before infection.

515 **Virus stock preparation.** To generate virus stocks, HEK293T cells were transfected with the  
516 proviral HIV or SIV DNA (5µg per well of a 6-well plate) using calcium phosphate method. Two  
517 days post-transfection, supernatants containing infectious virus were harvested. To normalize the  
518 amount of virus dose, relative infectivity was measured by TZM-bl assay and the activity of viral  
519 reverse transcriptase present in the supernatant was measured as described before [67].

520 **Viral replication kinetics.** Pre-stimulated PBMCs of different donors were infected with  
521 normalized virus stocks. The following day, cells were washed 3x in PBS to remove input virus



522 and each sample was split into triplicates and transferred to a 96-well plate. Virus-containing  
523 supernatant was harvested every 2 days and fresh medium RPMI 1640 medium supplemented with  
524 10% FCS, 2 mM glutamine, streptomycin/penicillin (Gibco) and IL-2 (10 ng/ml) (with or without  
525 500u/ml IFN $\alpha$ ) was added, up until day 10 or 12 (as indicated). The relative amount of infectious  
526 virus present in the harvested supernatants was measured by TZM-bl cell-based infectivity assay.

527 **Infectivity assay.** TZM-bl cells (10.000/well) were seeded in 96-well plates and infected with  
528 equal volumes of virus-containing cell supernatants. Infections were performed in duplicate (viral  
529 kinetics) or triplicate (transfections). Two days post-infection, viral infectivity was detected using  
530 the Gal-Screen kit from Applied Biosystems as recommended by the manufacturer.  $\beta$ -  
531 galactosidase activity was quantified as relative light units per second using microplate  
532 luminometer (Orion).

533 **Lentiviral susceptibility to human APOBEC3 proteins.** HEK293T cells were co-transfected  
534 with 4:1 ratio of proviral DNA and pcDNA APOBEC3 expression construct or pcDNA empty  
535 vector. Virus containing supernatants were harvested 2 days later and the produced infectious virus  
536 yield was measured using TZM-bl reporter cell line and Gal-Screen kit from Applied Biosystems  
537 as recommended by the manufacturer.  $\beta$ -galactosidase activity was quantified as relative light units  
538 per second using the Orion microplate luminometer.

539 **Lentiviral susceptibility to simian APOBEC proteins.** To assess relative lentiviral sensitivity to  
540 APOBEC proteins overexpression, HEK293T cells (in 24-well format) were co-transfected using  
541 PEI transfection reagent with 0.75  $\mu$ g of the indicated IMCs and 0.25  $\mu$ g of pcDNA3/V5-DEST  
542 APOBEC3 expression constructs. Virus containing supernatants were harvested 2 days later and  
543 used to infect TZM-bl reporter cells in triplicates.  $\beta$ -galactosidase activity was measured 2 days  
544 later using Gal-Screen kit (Applied Biosystems) as relative light units per second using microplate

545 luminometer. Infectious virus yield values of each IMC in the presence of A3 proteins were  
546 normalised to their corresponding pcDNA3/V5-DEST empty vector only control.

547 **Western blot.** Cells were co-transfected in 12-well plates with 2 µg of indicated IMC and 0.5 µg  
548 DNA of pcDNA3/V5-DEST APOBEC3 expression vector or empty pcDNA3/V5-DEST vector.  
549 Two days post-transfection, cells were lysed with Co-IP buffer (150 mM NaCl, 50 mM HEPES,  
550 5mM EDTA, 0.10% NP40, 0.5 mM sodium orthovanadate, 0.5 mM NaF, protease inhibitor  
551 cocktail from Roche) and cell-free virions were purified by centrifugation of cell culture  
552 supernatants through a 20% sucrose cushion at 20,800 g for 90 minutes at 4°C and lysed in CO-IP  
553 lysis buffer. Samples were reduced in the presence of β-mercaptoethanol by boiling at 95°C for 10  
554 min. Proteins were separated in 4 to 12% Bis-Tris gradient acrylamide gels (Invitrogen), blotted  
555 onto polyvinylidene difluoride (PVDF) membrane, and incubated with anti-V5(Cat#13202; Cell  
556 Signaling, 1:5000), anti-HIV-1 Env (Cat #12559, obtained through the NIH AIDS Reagent  
557 Program, 1:1000) or anti-HIV-2 Env (Cat #771, obtained through the NIH AIDS Reagent Program,  
558 1:500), anti-p24 (Cat #ab9071; Abcam, 1:1000) and or anti-p27(Cat#2321, obtained through the  
559 NIH AIDS Reagent Program 1:200 ), anti-GAPDH (Cat #607902, Biolegend, 1:1000). Blots were  
560 probed with IRDye® 680RD Goat anti-Rabbit IgG (H + L) (Cat #926-68071, LI-COR), IRDye®  
561 800RD Goat anti-Mouse IgG (H + L) (Cat #926-32210; LI-COR) and IRDye® 800RD Goat anti-  
562 Rat IgG (H + L) (CAT#925-32219; LI-COR) Odyssey antibodies all diluted to 1:20000 and  
563 scanned using a LI-COR Odyssey reader.

564 **A3 degradation assay.** To compare efficiency of different Vif in mediating degradation of A3G-  
565 HA and A3F-HA, 293T cells ( $1 \times 10^5$  per well) in 12 well plates were co-transfected with either  
566 A3G-HA (500 ng) or A3F-HA (500 ng or 100 ng) and titration of pCG-Vif-AU1 expression  
567 plasmids (0, 25, 50, 100 and 200 ng) using GeneJuice (Novagen) transfection reagent. To equalize

568 the amount of plasmid DNA transfected, empty pCG-AU1 vector was used. Then, 24 h post  
569 transfection the media was changed. After 44 h post transfection, cells were washed with PBS and  
570 lysed using 2× Laemmli buffer. Total protein in the cell lysate was estimated using the Lowry  
571 assay and 30 µg total protein from each cell lysate was used for immunoblotting with anti-HA  
572 antibody (Cat# H9658, Sigma, 1:10000), anti-AU1 antibody (Cat# ab3401, Abcam, 1:1000) and  
573 anti-α tubulin antibody (Cat # PA1-20988, Invitrogen, 1:1000) as primary antibodies. Secondary  
574 detection was performed using Licor IRDye antibodies produced in goat (IRDye 680-labeled anti-  
575 rabbit 1:10000 Cat # 926-68071 and IRDye 800-labeled anti mouse 1:10000 Cat # 926-32210).  
576 Immunoblots were quantified using Image Studio Software with normalization of each  
577 experimental lane to its respective α-tubulin band.

578 **HIV-2 and SIVsmm sequence analysis.** SIVsmm and HIV-2 isolate *vif* sequences were obtained  
579 from Los Alamos HIV sequence database ([www.hiv.lanl.gov](http://www.hiv.lanl.gov)). Consensus SIVsmm sequence was  
580 generated using available Vif amino acid sequences of SIVsmm primary isolates and Consensus  
581 Maker online tool (<https://www.hiv.lanl.gov/content/sequence/CONSENSUS/consensus.html>).  
582 To compare substitution ratios among available HIV-2 *vifs* in reference to SIVsmm consensus,  
583 nucleotide sequences were aligned using Clustal Omega [68] and analysed using SNAP v2.1.1  
584 ([https://www.hiv.lanl.gov/content/sequence/SNAP/SNAP.html?sample\\_input=1](https://www.hiv.lanl.gov/content/sequence/SNAP/SNAP.html?sample_input=1)). Average  
585 synonymous and non-synonymous substitution changes in each codon were plotted in Prism.

586 **Statistical analysis.** Statistical analysis was performed using GraphPad Prism software. Two-  
587 tailed Student's *t*-test was used to determine statistical significance. Unpaired tests were used with  
588 the exception of experiments involving PBMCs obtained from different donors. Significant  
589 differences are indicated as follows: \*,  $P < 0.05$ ; \*\*,  $P < 0.01$ ; \*\*\*,  $P < 0.001$ ; \*\*\*\*,  $P < 0.0001$ .

## 590 **Acknowledgments**

591 We thank Martha Mayer, Kerstin Regensburger and Regina Burger for technical assistance and  
592 Michael Emerman and Molly Ohainle for providing A3H constructs. TZM-bl cells were obtained  
593 through the NIH AIDS Reagent Program, Division of AIDS, NIAID, NIH: TZM-bl from Dr. John  
594 C. Kappes, Dr. Xiaoyun Wu and Tranzyme Inc. This work was funded in part by NIH AI083118  
595 (W.E.J.) and R01 AI050529 and UM1 AI 126620 (B.H.H.).

596

## 597 **REFERENCES**

- 598 1. Bell SM, Bedford T. Modern-day SIV viral diversity generated by extensive  
599 recombination and cross-species transmission. Silvestri G, editor. PLoS Pathog. 2017;13:  
600 e1006466. doi:10.1371/journal.ppat.1006466
- 601 2. Sharp PM, Hahn BH. Origins of HIV and the AIDS pandemic. Cold Spring Harb Perspect  
602 Med. 2011;1: a006841. doi:10.1101/cshperspect.a006841
- 603 3. Ayouba A, Akoua-Koffi C, Calvignac-Spencer S, Esteban A, Locatelli S, Li H, et al.  
604 Evidence for continuing cross-species transmission of SIVsmm to humans:  
605 Characterization of a new HIV-2 lineage in rural Côte d’Ivoire. AIDS. 2013;27: 2488–  
606 2491. doi:10.1097/01.aids.0000432443.22684.50
- 607 4. Santiago ML, Range F, Keele BF, Li Y, Bailes E, Bibollet-Ruche F, et al. Simian  
608 Immunodeficiency Virus Infection in Free-Ranging Sooty Mangabeys (*Cercocebus atys*  
609 *atys*) from the Taï Forest, Côte d’Ivoire: Implications for the Origin of Epidemic Human  
610 Immunodeficiency Virus Type 2. J Virol. 2005;79: 12515–12527.  
611 doi:10.1128/jvi.79.19.12515-12527.2005
- 612 5. Garcia-Tellez T, Huot N, Ploquin MJ, Rascle P, Jacquelin B, Müller-Trutwin M. Non-  
613 human primates in HIV research: Achievements, limits and alternatives. Infect Genet  
614 Evol. 2016;46: 324–332. doi:10.1016/j.meegid.2016.07.012

- 615 6. Gautam R, Carter AC, Katz N, Butler IF, Barnes M, Hasegawa A, et al. In vitro  
616 characterization of primary SIVsmm isolates belonging to different lineages. In vitro  
617 growth on rhesus macaque cells is not predictive for in vivo replication in rhesus  
618 macaques. *Virology*. 2007;362: 257–70. doi:10.1016/j.virol.2006.12.037
- 619 7. Sauter D, Kirchhoff F. Key Viral Adaptations Preceding the AIDS Pandemic. *Cell Host*  
620 *Microbe*. 2019;25: 27–38. doi:10.1016/j.chom.2018.12.002
- 621 8. Heusinger E, Deppe K, Sette P, Krapp C, Kmiec D, Kluge SF, et al. Preadaptation of  
622 SIVsmm facilitated Env-mediated counteraction of human tetherin by HIV-2. *J Virol*.  
623 2018; JVI.00276-18. doi:10.1128/JVI.00276-18
- 624 9. Le Tortorec A, Neil SJD. Antagonism to and Intracellular Sequestration of Human  
625 Tetherin by the Human Immunodeficiency Virus Type 2 Envelope Glycoprotein. *J Virol*.  
626 2009;83: 11966–11978. doi:10.1128/jvi.01515-09
- 627 10. Laguette N, Sobhian B, Casartelli N, Ringeard M, Chable-Bessia C, Ségéral E, et al.  
628 SAMHD1 is the dendritic- and myeloid-cell-specific HIV-1 restriction factor counteracted  
629 by Vpx. *Nature*. 2011;474: 654–657. doi:10.1038/nature10117
- 630 11. Chougui G, Munir-Matloob S, Matkovic R, Martin MM, Morel M, Lahouassa H, et al.  
631 HIV-2/SIV viral protein X counteracts HUSH repressor complex. *Nat Microbiol*. 2018;3:  
632 891–897. doi:10.1038/s41564-018-0179-6
- 633 12. Heigele A, Kmiec D, Regensburger K, Langer S, Peiffer L, Stürzel CM, et al. The Potency  
634 of Nef-Mediated SERINC5 Antagonism Correlates with the Prevalence of Primate  
635 Lentiviruses in the Wild. *Cell Host Microbe*. 2016;20: 381–391.  
636 doi:10.1016/j.chom.2016.08.004
- 637 13. Etienne L, Hahn BH, Sharp PM, Matsen FA, Emerman M. Gene loss and adaptation to  
638 hominids underlie the ancient origin of HIV-1. *Cell Host Microbe*. 2013;14: 85–92.  
639 doi:10.1016/j.chom.2013.06.002
- 640 14. Simon V, Bloch N, Landau NR. Intrinsic host restrictions to HIV-1 and mechanisms of  
641 viral escape. *Nat Immunol*. 2015;16: 546–553. doi:10.1038/ni.3156
- 642 15. Delviks-Frankenberry KA, Desimmi BA, Pathak VK. Structural insights into APOBEC3-

- 643 mediated lentiviral restriction. *Viruses*. MDPI AG; 2020. doi:10.3390/v12060587
- 644 16. Olson ME, Harris RS, Harki DA. APOBEC Enzymes as Targets for Virus and Cancer  
645 Therapy. *Cell Chemical Biology*. Elsevier Ltd; 2018. pp. 36–49.  
646 doi:10.1016/j.chembiol.2017.10.007
- 647 17. Nakano Y, Aso H, Soper A, Yamada E, Moriwaki M, Juarez-Fernandez G, et al. A  
648 conflict of interest: The evolutionary arms race between mammalian APOBEC3 and  
649 lentiviral Vif. *Retrovirology*. BioMed Central Ltd.; 2017. doi:10.1186/s12977-017-0355-4
- 650 18. Salter JD, Bennett RP, Smith HC. The APOBEC Protein Family: United by Structure,  
651 Divergent in Function. *Trends in Biochemical Sciences*. Elsevier Ltd; 2016. pp. 578–594.  
652 doi:10.1016/j.tibs.2016.05.001
- 653 19. Jónsson SR, Andrésdóttir V. Host restriction of lentiviruses and viral countermeasures:  
654 APOBEC3 and vif. *Viruses*. Multidisciplinary Digital Publishing Institute (MDPI); 2013.  
655 pp. 1934–1947. doi:10.3390/v5081934
- 656 20. Berger G, Durand S, Fargier G, Nguyen XN, Cordeil S, Bouaziz S, et al. Apobec3a is a  
657 specific inhibitor of the early phases of hiv-1 infection in myeloid cells. *PLoS Pathog*.  
658 2011;7. doi:10.1371/journal.ppat.1002221
- 659 21. Koning FA, Goujon C, Bauby H, Malim MH. Target Cell-Mediated Editing of HIV-1  
660 cDNA by APOBEC3 Proteins in Human Macrophages. *J Virol*. 2011;85: 13448–13452.  
661 doi:10.1128/jvi.00775-11
- 662 22. Hultquist JF, Lengyel JA, Refsland EW, LaRue RS, Lackey L, Brown WL, et al. Human  
663 and Rhesus APOBEC3D, APOBEC3F, APOBEC3G, and APOBEC3H Demonstrate a  
664 Conserved Capacity To Restrict Vif-Deficient HIV-1. *J Virol*. 2011;85: 11220–11234.  
665 doi:10.1128/jvi.05238-11
- 666 23. Anderson BD, Ikeda T, Moghadasi SA, Martin AS, Brown WL, Harris RS. Natural  
667 APOBEC3C variants can elicit differential HIV-1 restriction activity. *Retrovirology*.  
668 2018;15: 78. doi:10.1186/s12977-018-0459-5
- 669 24. Gifford RJ, Katzourakis A, Tristem M, Pybus OG, Winters M, Shafer RW. A transitional  
670 endogenous lentivirus from the genome of a basal primate and implications for lentivirus

- 671 evolution. Proc Natl Acad Sci U S A. 2008;105: 20362–20367.  
672 doi:10.1073/pnas.0807873105
- 673 25. Desrosiers RC, Lifson JD, Gibbs JS, Czajak SC, Howe AYM, Arthur LO, et al.  
674 Identification of Highly Attenuated Mutants of Simian Immunodeficiency Virus. J Virol.  
675 1998;72: 1431–1437. doi:10.1128/jvi.72.2.1431-1437.1998
- 676 26. Bogerd HP, Doehle BP, Wiegand HL, Cullen BR. A single amino acid difference in the  
677 host APOBEC3G protein controls the primate species specificity of HIV type 1 virion  
678 infectivity factor. Proc Natl Acad Sci U S A. 2004;101: 3770–3774.  
679 doi:10.1073/pnas.0307713101
- 680 27. Binning JM, Chesarino NM, Emerman M, Gross JD. Structural Basis for a Species-  
681 Specific Determinant of an SIV Vif Protein toward Hominid APOBEC3G Antagonism.  
682 Cell Host Microbe. 2019;26: 739-747.e4. doi:10.1016/j.chom.2019.10.014
- 683 28. Etienne L, Bibollet-Ruche F, Sudmant PH, Wu LI, Hahn BH, Emerman M. The Role of  
684 the Antiviral APOBEC3 Gene Family in Protecting Chimpanzees against Lentiviruses  
685 from Monkeys. PLoS Pathog. 2015;11. doi:10.1371/journal.ppat.1005149
- 686 29. Letko M, Silvestri G, Hahn BH, Bibollet-Ruche F, Gokcumen O, Simon V, et al. Vif  
687 Proteins from Diverse Primate Lentiviral Lineages Use the Same Binding Site in  
688 APOBEC3G. J Virol. 2013;87: 11861–11871. doi:10.1128/jvi.01944-13
- 689 30. Krupp A, McCarthy KR, Ooms M, Letko M, Morgan JS, Simon V, et al. APOBEC3G  
690 Polymorphism as a Selective Barrier to Cross-Species Transmission and Emergence of  
691 Pathogenic SIV and AIDS in a Primate Host. PLoS Pathog. 2013;9.  
692 doi:10.1371/journal.ppat.1003641
- 693 31. Bertine M, Charpentier C, Visseaux B, Storto A, Collin G, Larrouy L, et al. High level of  
694 APOBEC3F/3G editing in HIV-2 DNA vif and pol sequences from antiretroviral-naive  
695 patients. AIDS. 2015;29: 779–784. doi:10.1097/QAD.0000000000000607
- 696 32. Ochsenbauer C, Edmonds TG, Ding H, Keele BF, Decker J, Salazar MG, et al. Generation  
697 of Transmitted/Founder HIV-1 Infectious Molecular Clones and Characterization of Their  
698 Replication Capacity in CD4 T Lymphocytes and Monocyte-Derived Macrophages. J



- 699 Virol. 2012;86: 2715–2728. doi:10.1128/JVI.06157-11
- 700 33. Parrish NF, Gao F, Li H, Giorgi EE, Barbian HJ, Parrish EH, et al. Phenotypic properties  
701 of transmitted founder HIV-1. *Proc Natl Acad Sci.* 2013;110: 6626–6633.  
702 doi:10.1073/pnas.1304288110
- 703 34. Regier DA, Desrosiers RC. The Complete Nucleotide Sequence of a Pathogenic  
704 Molecular Clone of Simian Immunodeficiency Virus. *AIDS Res Hum Retroviruses.*  
705 1990;6: 1221–1231. doi:10.1089/aid.1990.6.1221
- 706 35. Shibata R, Miura T, Hayami M, Ogawa K, Sakai H, Kiyomasu T, et al. Mutational  
707 analysis of the human immunodeficiency virus type 2 (HIV-2) genome in relation to HIV-  
708 1 and simian immunodeficiency virus SIV (AGM). *J Virol.* 1990;64: 742–7. Available:  
709 <http://www.ncbi.nlm.nih.gov/pubmed/2296082>
- 710 36. Yuste E, Johnson W, Pavlakis GN, Desrosiers RC. Virion Envelope Content, Infectivity,  
711 and Neutralization Sensitivity of Simian Immunodeficiency Virus. *J Virol.* 2005;79:  
712 12455–12463. doi:10.1128/jvi.79.19.12455-12463.2005
- 713 37. Mulligan MJ, Yamshchikov G V, Ritter GD, Gao F, Jin MJ, Nail CD, et al. Cytoplasmic  
714 domain truncation enhances fusion activity by the exterior glycoprotein complex of  
715 human immunodeficiency virus type 2 in selected cell types. *J Virol.* 1992;66: 3971–3975.  
716 doi:10.1128/jvi.66.6.3971-3975.1992
- 717 38. Novembre FJ, De Rosayro J, O’Neil SP, Anderson DC, Klumpp SA, McClure HM.  
718 Isolation and characterization of a neuropathogenic simian immunodeficiency virus  
719 derived from a sooty mangabey. *J Virol.* 1998;72: 8841–51. Available:  
720 <http://www.ncbi.nlm.nih.gov/pubmed/9765429>
- 721 39. Fischer W, Apetrei C, Santiago ML, Li Y, Gautam R, Pandrea I, et al. Distinct  
722 Evolutionary Pressures Underlie Diversity in Simian Immunodeficiency Virus and Human  
723 Immunodeficiency Virus Lineages. *J Virol.* 2012;86: 13217–13231.  
724 doi:10.1128/jvi.01862-12
- 725 40. Sauter D, Kirchhoff F. Multilayered and versatile inhibition of cellular antiviral factors by  
726 HIV and SIV accessory proteins. *Cytokine Growth Factor Rev.* 2018;40: 3–12.



- 727 doi:10.1016/j.cytogfr.2018.02.005
- 728 41. Malim MH, Bieniasz PD. HIV Restriction Factors and Mechanisms of Evasion. Cold  
729 Spring Harb Perspect Med. 2012;2: a006940–a006940. doi:10.1101/cshperspect.a006940
- 730 42. Harris RS, Hultquist JF, Evans DT. The Restriction Factors of Human Immunodeficiency  
731 Virus. J Biol Chem. 2012;287: 40875–40883. doi:10.1074/jbc.R112.416925
- 732 43. Kao S, Goila-Gaur R, Miyagi E, Khan MA, Opi S, Takeuchi H, et al. Production of  
733 infectious virus and degradation of APOBEC3G are separable functional properties of  
734 human immunodeficiency virus type 1 Vif. Virology. 2007;369: 329–339.  
735 doi:10.1016/j.virol.2007.08.005
- 736 44. Stavrou S, Ross SR. APOBEC3 Proteins in Viral Immunity. J Immunol. 2015;195: 4565–  
737 4570. doi:10.4049/jimmunol.1501504
- 738 45. LaRue RS, Lengyel J, Jónsson SR, Andrésdóttir V, Harris RS. Lentiviral Vif Degrades the  
739 APOBEC3Z3/APOBEC3H Protein of Its Mammalian Host and Is Capable of Cross-  
740 Species Activity. J Virol. 2010;84: 8193–8201. doi:10.1128/jvi.00685-10
- 741 46. Xu H, Svarovskaia ES, Barr R, Zhang Y, Khan MA, Strebel K, et al. A single amino acid  
742 substitution in human APOBEC3G antiretroviral enzyme confers resistance to HIV-1  
743 virion infectivity factor-induced depletion. Proc Natl Acad Sci U S A. 2004;101: 5652–  
744 5657. doi:10.1073/pnas.0400830101
- 745 47. Schröfelbauer B, Chen D, Landau NR. A single amino acid of APOBEC3G controls its  
746 species-specific interaction with virion infectivity factor (Vif). Proc Natl Acad Sci U S A.  
747 2004;101: 3927–3932. doi:10.1073/pnas.0307132101
- 748 48. Smith JL, Izumi T, Borbet TC, Hagedorn AN, Pathak VK. HIV-1 and HIV-2 Vif Interact  
749 with Human APOBEC3 Proteins Using Completely Different Determinants. J Virol.  
750 2014;88: 9893–9908. doi:10.1128/jvi.01318-14
- 751 49. Kitamura S, Ode H, Nakashima M, Imahashi M, Naganawa Y, Kurosawa T, et al. The  
752 APOBEC3C crystal structure and the interface for HIV-1 Vif binding. Nat Struct Mol  
753 Biol. 2012;19: 1005–1011. doi:10.1038/nsmb.2378

- 754 50. Nakashima M, Ode H, Kawamura T, Kitamura S, Naganawa Y, Awazu H, et al. Structural  
755 Insights into HIV-1 Vif-APOBEC3F Interaction. *J Virol.* 2016;90: 1034–1047.  
756 doi:10.1128/jvi.02369-15
- 757 51. Ariën KK, Abraha A, Quiñones-Mateu ME, Kestens L, Vanham G, Arts EJ. The  
758 Replicative Fitness of Primary Human Immunodeficiency Virus Type 1 (HIV-1) Group  
759 M, HIV-1 Group O, and HIV-2 Isolates. *J Virol.* 2005;79: 8979–8990.  
760 doi:10.1128/jvi.79.14.8979-8990.2005
- 761 52. Binning JM, Smith AM, Hultquist JF, Craik CS, Caretta Cartozo N, Campbell MG, et al.  
762 Fab-based inhibitors reveal ubiquitin independent functions for HIV Vif neutralization of  
763 APOBEC3 restriction factors. Ross SR, editor. *PLOS Pathog.* 2018;14: e1006830.  
764 doi:10.1371/journal.ppat.1006830
- 765 53. Kim DY, Kwon E, Hartley PD, Crosby DC, Mann S, Krogan NJ, et al. CBF $\beta$  Stabilizes  
766 HIV Vif to Counteract APOBEC3 at the Expense of RUNX1 Target Gene Expression.  
767 *Mol Cell.* 2013;49: 632–644. doi:10.1016/j.molcel.2012.12.012
- 768 54. Foster TL, Wilson H, Iyer SS, Coss K, Doores K, Smith S, et al. Resistance of  
769 Transmitted Founder HIV-1 to IFITM-Mediated Restriction. *Cell Host Microbe.* 2016;20:  
770 429–442. doi:10.1016/j.chom.2016.08.006
- 771 55. Mason RD, Welles HC, Adams C, Chakrabarti BK, Gorman J, Zhou T, et al. Targeted  
772 Isolation of Antibodies Directed against Major Sites of SIV Env Vulnerability. *PLoS*  
773 *Pathog.* 2016;12. doi:10.1371/journal.ppat.1005537
- 774 56. Ribeiro AC, Maia e Silva A, Santa-Marta M, Pombo A, Moniz-Pereira J, Goncalves J, et  
775 al. Functional Analysis of Vif Protein Shows Less Restriction of Human  
776 Immunodeficiency Virus Type 2 by APOBEC3G. *J Virol.* 2005;79: 823–833.  
777 doi:10.1128/jvi.79.2.823-833.2005
- 778 57. Ara A, Love RP, Chelico L. Different Mutagenic Potential of HIV-1 Restriction Factors  
779 APOBEC3G and APOBEC3F Is Determined by Distinct Single-Stranded DNA Scanning  
780 Mechanisms. *PLoS Pathog.* 2014;10. doi:10.1371/journal.ppat.1004024
- 781 58. Adolph MB, Love RP, Chelico L. Biochemical Basis of APOBEC3 Deoxycytidine

- 782 Deaminase Activity on Diverse DNA Substrates. ACS Infectious Diseases. American  
783 Chemical Society; 2018. pp. 224–238. doi:10.1021/acsinfecdis.7b00221
- 784 59. Holmes RK, Koning FA, Bishop KN, Malim MH. APOBEC3F can inhibit the  
785 accumulation of HIV-1 reverse transcription products in the absence of hypermutation:  
786 Comparisons with APOBEC3G. J Biol Chem. 2007;282: 2587–2595.  
787 doi:10.1074/jbc.M607298200
- 788 60. Ara A, Love RP, Follack TB, Ahmed KA, Adolph MB, Chelico L. Mechanism of  
789 Enhanced HIV Restriction by Virion Coencapsidated Cytidine Deaminases APOBEC3F  
790 and APOBEC3G. J Virol. 2017;91. doi:10.1128/jvi.02230-16
- 791 61. Feng Y, Love RP, Chelico L. HIV-1 viral infectivity factor (Vif) alters processive single-  
792 stranded DNA scanning of the retroviral restriction factor APOBEC3G. J Biol Chem.  
793 2013;288: 6083–6094. doi:10.1074/jbc.M112.421875
- 794 62. Britan-Rosich E, Nowarski R, Kotler M. Multifaceted counter-APOBEC3G mechanisms  
795 employed by HIV-1 Vif. J Mol Biol. 2011;410: 1065–1076.  
796 doi:10.1016/j.jmb.2011.03.058
- 797 63. Platt EJ, Wehrly K, Kuhmann SE, Chesebro B, Kabat D. Effects of CCR5 and CD4 cell  
798 surface concentrations on infections by macrophagetropic isolates of human  
799 immunodeficiency virus type 1. J Virol. 1998;72: 2855–64. Available:  
800 <http://www.ncbi.nlm.nih.gov/pubmed/9525605>
- 801 64. Derdeyn CA, Decker JM, Sfakianos JN, Wu X, O'Brien WA, Ratner L, et al. Sensitivity  
802 of human immunodeficiency virus type 1 to the fusion inhibitor T-20 is modulated by  
803 coreceptor specificity defined by the V3 loop of gp120. J Virol. 2000;74: 8358–67.  
804 Available: <http://www.ncbi.nlm.nih.gov/pubmed/10954535>
- 805 65. Feng Y, Love RP, Ara A, Baig TT, Adolph MB, Chelico L. Natural polymorphisms and  
806 Oligomerization of Human APOBEC3H contribute to single-stranded DNA scanning  
807 ability. J Biol Chem. 2015;290: 27188–27203. doi:10.1074/jbc.M115.666065
- 808 66. OhAinle M, Helms L, Vermeire J, Roesch F, Humes D, Basom R, et al. A virus-  
809 packageable CRISPR screen identifies host factors mediating interferon inhibition of HIV.

810 Elife. 2018;7. doi:10.7554/eLife.39823

811 67. Papkalla A, Münch J, Otto C, Kirchhoff F. Nef enhances human immunodeficiency virus  
812 type 1 infectivity and replication independently of viral coreceptor tropism. *J Virol.*  
813 2002;76: 8455–9. Available: <http://www.ncbi.nlm.nih.gov/pubmed/12134048>

814 68. Madeira F, Park YM, Lee J, Buso N, Gur T, Madhusoodanan N, et al. The EMBL-EBI  
815 search and sequence analysis tools APIs in 2019. *Nucleic Acids Res.* 2019;47: W636–  
816 W641. doi:10.1093/nar/gkz268

817

## 818 **FIGURE LEGENDS**

819 **Figure 1: HIV-1, HIV-2 and SIVsmm differ significantly in IFN sensitivity.** (A) Replication  
820 of HIV-1, HIV-2 and SIV proviral constructs in primary human CD4<sup>+</sup> T cells. The results show  
821 mean infectious virus yields (n = 3) measured by infection of TZM-bl reporter cells with  
822 normalized volumes of the supernatants infected CD4<sup>+</sup> T cell cultures derived from three different  
823 PBMC donors. (B) Mean infectious virus yield ( $\pm$ SEM) of the five HIV-1, five HIV-2 and six  
824 SIVsmm IMCs measured at the indicated days post-infection. (C) Replication of HIV-1, HIV-2  
825 and SIV IMCs in CD4<sup>+</sup> T cells infected as described in panel A the presence of IFN- $\alpha$ . (D) Mean  
826 infectious virus yields of HIV-1, HIV-2 and SIVsmm detected in the presence of IFN- $\alpha$ .

827 **Figure 2: Sensitivity of HIV-1, HIV-2 and SIVsmm to human APOBEC3 family members.**

828 (A) Relevance of an intact *vif* gene for HIV-1, HIV-2 and SIV replication in primary human CD4<sup>+</sup>  
829 T cells. Replication kinetics of HIV-1, HIV-2 or SIVsmm IMCs containing intact or disrupted *vif*  
830 genes in CD4<sup>+</sup> T cells in the presence of 500 U/ml IFN- $\alpha$  (dashed lines) or absence of IFN- $\alpha$  (solid  
831 lines). Infectious virus yield was measured using the TZM-bl reporter cell infectivity assay. (B)  
832 Proviral constructs of the indicated IMCs of HIV-1, HIV-2, or SIVsmm and a plasmid expressing  
833 the various APOBEC3 proteins were cotransfected into HEK293T cells. Infectious virus yield was

834 measured using the TZM-bl reporter cell infectivity assay. For each proviral construct, values were  
835 normalized to the infectious virus yield obtained in the absence of APOBEC3 expression construct  
836 (100%). Shown is the mean from 3 to 8 independent experiments each measured in triplicates  $\pm$   
837 SEM. The right panel shows comparisons of the sensitivity of the HIV-1, HIV-2 and SIVsmm  
838 group to the various APOBEC3 family members. Symbols represent the average infectious virus  
839 yield relative to the absence of APOBEC3s (100%) obtained for individual IMCs. Bar diagram  
840 shows the infectious virus yield obtained for all IMCs from the indicated groups. \*,  $P < 0.05$ ; \*\*,  $P < 0.01$ ; \*\*\*,  $P < 0.001$ , calculated using Student's t test.

842 **Figure 3: Effect of HIV-1, HIV-2 and SIVsmm on A3F and A3G protein expression levels.**  
843 **(A, B)** Infectious HIV-1 yield (top) and expression levels of viral proteins and human (A) A3F or  
844 (B) A3G in HEK293T cells transfected with the indicated proviral constructs. The right panels  
845 show the correlations between infectious virus yield and the A3F or A3G protein expression levels  
846 in cellular extracts measured in the presence of proviral constructs relative to those measured in  
847 the presence of the control vector. All A3F and A3G expression values were normalized for the  
848 GAPDH loading control. Infectious virus yield was measured using the TZM-bl reporter cell  
849 infectivity assay and values were normalized to those obtained in the absence of APOBEC3  
850 expression construct (100%). Shown are mean values ( $\pm$ SD) from triplicate infection. **(C)** Vif  
851 mediated degradation of A3F. 293T cells were cotransfected with constant quantity of A3F  
852 expression plasmid (100ng) and increasing amounts of HIV or SIV Vif-AU1 expression  
853 constructs. Forty-eight hours post transfection, cell lysates were collected. Proteins from cell  
854 lysates were separated by SDS PAGE, transferred to nitrocellulose membrane and probed using  
855 antibodies, as labeled, with  $\alpha$ -tubulin serving as the loading control.

856 **Figure 4: Species-specific effects of human and monkey A3F proteins on HIV-1, HIV-2 and**  
857 **SIVsmm inhibition.** (A) Amino acid alignment of the human and monkey A3F variants used for  
858 functional analysis. Dots indicate amino acid identity and some important domains and residues  
859 are highlighted. (B) Wild-type and *vif*-defective HIV-1 CH077 and various HIV-2 and SIV  
860 proviral constructs and vectors expressing the indicated human, sooty mangabey and rhesus A3F  
861 proteins were cotransfected into HEK293T cells and infectious virus yield was measured using the  
862 TZM-bl reporter cell infectivity assay. Values were normalized to the infectious virus yield  
863 obtained in the absence of APOBEC3 expression construct (100%). Shown is the mean N=4  
864 independent experiments measured in triplicates  $\pm$  SEM. (C) Mean infectious virus yield ( $\pm$ SEM)  
865 of the three HIV-2 and four SIVsmm IMCs in the presence of the human or the two SMM or MAC  
866 A3F proteins, respectively. HEK293T cells were cotransfected with proviral constructs and  
867 APOBEC3 expression vectors and infectious virus yields determined as described in panel A. \*\*,  
868  $P < 0.01$ ; \*\*\*,  $P < 0.001$ , calculated using Student's t test.

869 **Figure 5: Species-specific effects of human and monkey A3G proteins on HIV-1, HIV-2 and**  
870 **SIVsmm inhibition.** (A) Amino acid alignment of the human and macaque A3G variants used for  
871 functional analysis. Dots indicate amino acid identity and some important domains and residues  
872 are highlighted. (B) Wild-type and *vif*-defective HIV-1 CH077 and various HIV-2 and SIV  
873 proviral constructs and vectors expressing the indicated human and macaque A3G proteins were  
874 cotransfected into HEK293T cells and infectious virus yield was measured using the TZM-bl  
875 reporter cell infectivity assay. Shown is the mean of N=4 independent experiments measured in  
876 triplicates  $\pm$  SEM. Values were normalized those obtained in the absence of A3F expression  
877 construct (100%). (C) Mean infectious virus yield ( $\pm$ SEM) of the HIV-2 and SIVsmm IMCs in the

878 presence of the human or MAC A3G proteins, respectively. \*,  $P < 0.05$ ; \*\*,  $P < 0.01$ , calculated  
879 using Student's t test.

880 **Figure 6: Counteraction of human and sooty mangabey A3H proteins by HIV-1, HIV-2 and**  
881 **SIVsmm.** (A) Amino acid alignment of the human and SMM A3H variants used for functional  
882 analysis. Dots indicate nucleotide identity. Some relevant domains and residues are highlighted.  
883 (B) Counteraction of the A3H variant shown in panel A by the indicated HIV and SIV IMCs.  
884 Shown is the mean  $N=4$  independent experiments measured in triplicates  $\pm$  SEM. See legend to  
885 figure 5 for detail. (C) Mean infectious virus yield ( $\pm$ SEM) of the HIV-2 and SIVsmm IMCs in  
886 the presence of the human or SMM A3H proteins, respectively. \*\*,  $P < 0.01$ , calculated using  
887 Student's t test.

888 **Figure 7: Role of amino acid 128 in restriction of HIV-1, HIV-2 and SIVsmm by A3F.** (A-C)  
889 Proviral constructs of the infectious molecular clones of (A) HIV-1 CH077, (B) HIV-2 7312, or  
890 SIVsmm L2 and increasing amounts of plasmid expressing the HA-tagged wildtype and mutant  
891 forms of human and SMM A3F were co-transfected into HEK293T cells. Infectious virus yield  
892 was measured using the TZM-bl reporter cell infectivity assay. For each proviral construct, values  
893 were normalized to the infectious virus yield obtained in the absence of ZAP (100%). Shown is  
894 the mean from 3 independent experiments each measured in triplicates  $\pm$  SEM. The right panels  
895 show representative Western blots of HEK293T cells cotransfected with the indicated wildtype or  
896 *vif*-defective proviral constructs or an empty control vector (CTRL) and the various A3F  
897 expression constructs.

898 **Figure 8: Identification and analysis of potential human-specific adaptation in Vif.** (A)  
899 Alignment of Vif amino acid sequences from HIV-2 and SIV IMCs analyzed in the present study.  
900 An SIVsmm consensus Vif sequence is shown on top for comparison. Dots indicate amino acid



901 identity and dashes indicate gaps introduced to optimize the alignment. The upper panel shows  
902 HIV-2 synonymous (blue dashed line) and non-synonymous (red line) substitution rates for each  
903 codon as compared to SIVsmm consensus Vif. Some known interaction sites and domains are  
904 indicated. **(B)** Frequency plots of the N-terminal part of HIV-2 and SIVsmm Vif amino acid  
905 sequences. **(C, D)** Effect of mutations predicted to render the SIVsmm Vif more similar to HIV-2  
906 Vif proteins on counteraction of SMM or human A3F. HEK293T cells were cotransfected with  
907 the indicated SIVsmm proviral constructs and increasing doses of A3F expression vectors, and  
908 infectious virus yield was measured by the TZM-bl reporter assay. Mean infection values ( $\pm$  SEM)  
909 were obtained from three or four independent experiments and normalized to those obtained in the  
910 absence of A3F expression (100%). The right panels provide AUC (area under the curve)  
911 calculated from inhibition curves as shown in the left panels.

912 **Figure 9: Impact of Y45H and T84S substitutions in Vif on the sensitivity of SIVsmm to**  
913 **inhibition by human or SMM A3F.** **(A)** HEK293T cells were cotransfected with the indicated  
914 SIVsmm proviral constructs and A3F expression vectors and infectious virus yield was measured  
915 by TZM-bl reporter assay. Mean infection values ( $\pm$  SEM) were obtained from three to four  
916 independent experiments and normalized to those obtained in the absence of A3F expression  
917 (100%). \*,  $P < 0.05$ ; \*\*\*,  $P < 0.001$ , calculated using Student's t test. **(B)** Infectious HIV-1 yield  
918 (top) and expression levels of viral proteins and human or SMM A3F in HEK293T cells transfected  
919 with the indicated proviral and A3F expression constructs.

920 **Figure 10: Replication of Vif mutant HIV-2 and SIVsmm IMCs in human CD4+ T cells.** **(A)**  
921 Mean infectious virus yields measured by triplicate infection of TZM-bl reporter cells with  
922 normalized volumes of the supernatants from infected CD4+ T cell cultures derived from four  
923 different PBMC donors. **(B)** Infectious virus yields at 4 days post-infection. **(C)** Cumulative



924 infectious virus production in PBMCs infected with the indicated SIVsmm constructs. Shown are  
925 AUCs for the replication kinetics as indicated in panel A but calculated for each of the four donors  
926 (indicated by a different symbol) individually. \*,  $P < 0.05$ ; \*\*,  $P < 0.01$ , \*\*\*,  $P < 0.001$ , calculated  
927 using Student's t test for paired comparisons.

928

## 929 LEGENDS TO SUPPLEMENTAL FIGURES

930 **Figure S1.** Virus production by wild-type and *vif*-defective HIV-1, HIV-2 and SIV constructs in  
931 the absence and presence of transient expression of the indicated APOBEC3 proteins. HEK293T  
932 were cotransfected with the indicated HIV and SIV proviral constructs and expression vectors for  
933 the indicated A3 proteins or empty vector (CTRL). Supernatants were harvested 2 days later, and  
934 infectious virus yield was determined by infecting TZM-bl indicator cells. Shown are average  
935 values of a representative experiment measured in triplicates  $\pm$ SD.

936 **Figure S2.** Sensitivity of HIV-1, HIV-2 and SIVsmm to human APOBEC3-mediated restriction.  
937 (A) Proviral constructs of indicated IMCs of HIV-1, HIV-2 or SIVsmm and a plasmid expressing  
938 the indicated HA-tagged APOBEC3 protein were cotransfected into HEK293T cells. Viral  
939 supernatant and cell lysates were collected 48 hours post-transfection. Proteins from cell lysate  
940 and viral lysate were separated by SDS PAGE, transferred to nitrocellulose membrane and probed  
941 using antibodies, as labeled, with  $\alpha$ -tubulin or HIV-1 p24 serving as the loading controls. The HIV-  
942 1 p24 antibody was not able to cross react and detect the p27 capsid protein from all SIVsmm  
943 IMC. Thus, only cell lysate immunoblots were quantified with normalization of each experimental  
944 lane to its respective  $\alpha$ -tubulin (bar graph). (B) Vif mediated degradation of A3F and A3G. 293T  
945 cells were cotransfected with constant quantity of A3F or A3G expression plasmid (500ng) and  
946 increasing amounts of HIV or SIV Vif –AU1 expression constructs. Cell lysate was collected 48

947 hours and proteins from cell lysates were separated by SDS PAGE, transferred to nitrocellulose  
948 membrane and probed using specific antibodies, as labeled, with  $\alpha$ -tubulin serving as the loading  
949 control.

950 **Figure S3.** Frequency of specific amino acid residues at positions 28, 32, 45 and 84 in SIV and  
951 HIV-2 Vif proteins. Amino acid (aa) frequencies were calculated based on the 2018 Los Alamos  
952 HIV-2/SIVsmm Vif protein curated alignment. Number of sequences may differ because in some  
953 cases the amino acid was not known.

954 **Figure S4.** Virus production by wild-type and Vif mutant HIV-1 and SIVsmm constructs in the  
955 absence and presence of increasing amounts of human (upper) or SMM (low) A3F proteins.  
956 Proviral constructs of the indicated infectious molecular clones of HIV-1 or SIVsmm L2 and  
957 increasing amounts of a plasmids expressing the hum or smFII A3F were co-transfected into  
958 HEK293T cells, the amount of DNA was kept constant by addition of an empty vector. Infectious  
959 virus yield was measured using TZM-bl reporter cell infectivity assay. Shown are the mean values  
960 from at least 3 independent experiments each measured in triplicates  $\pm$  SEM.

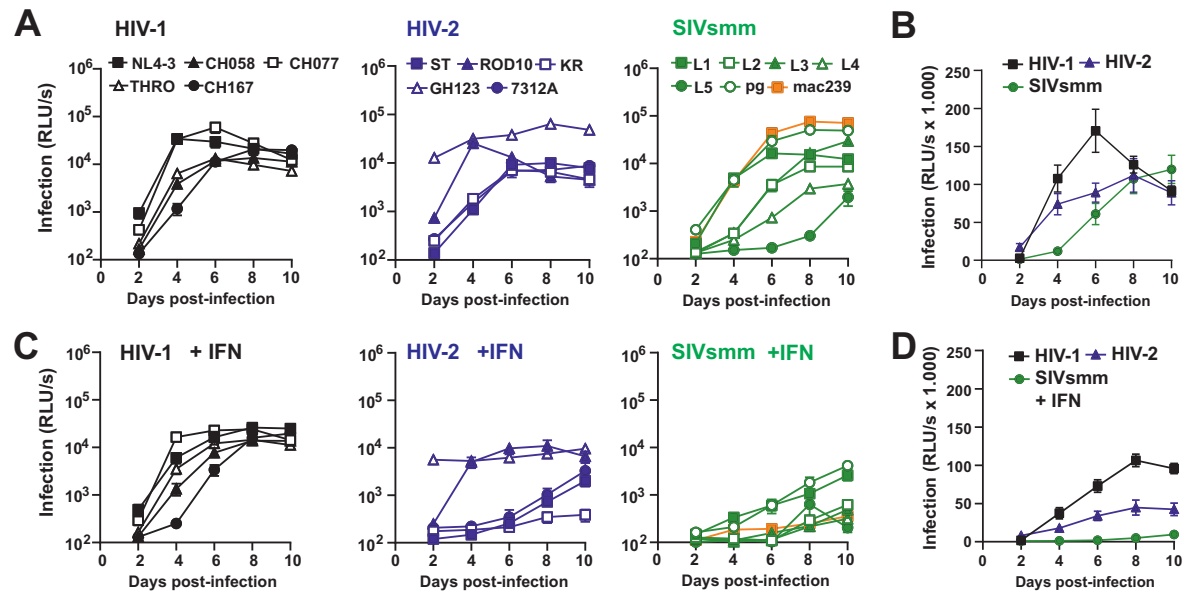

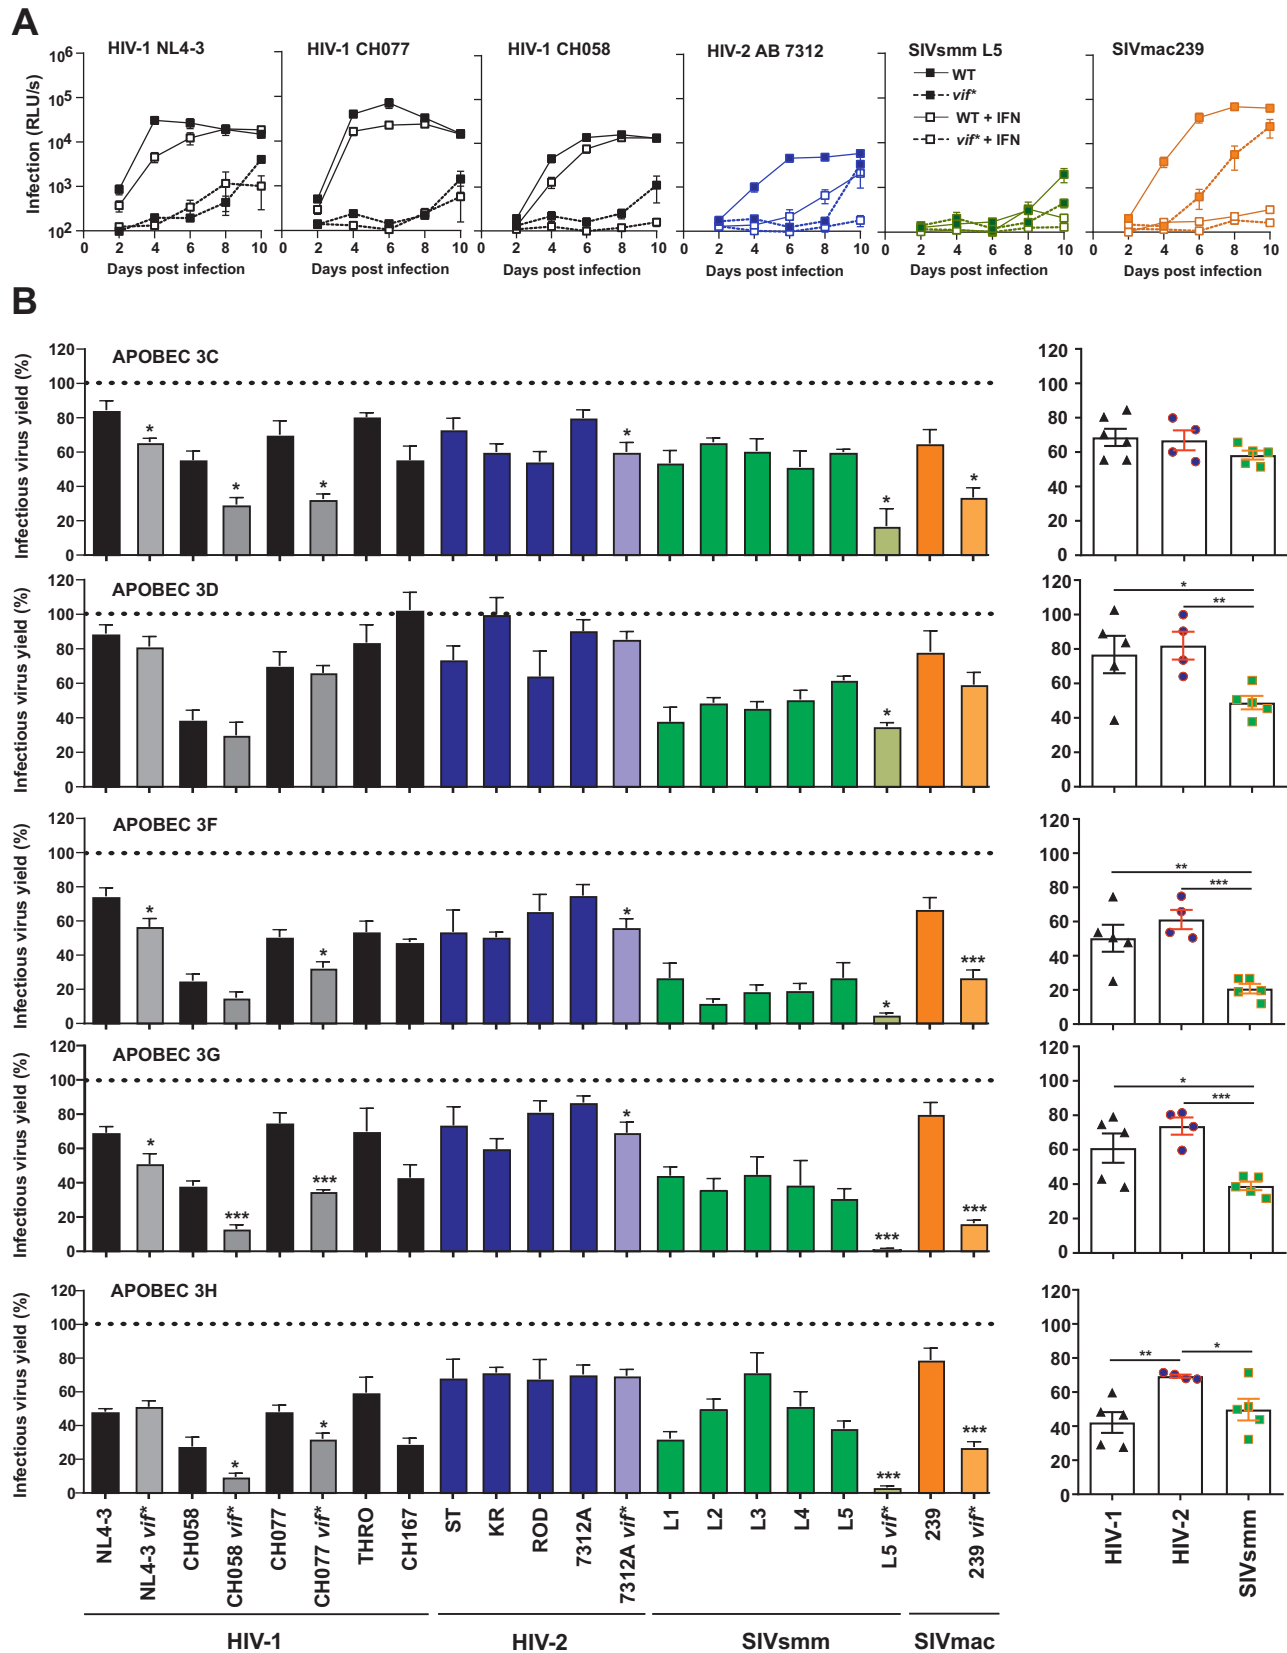

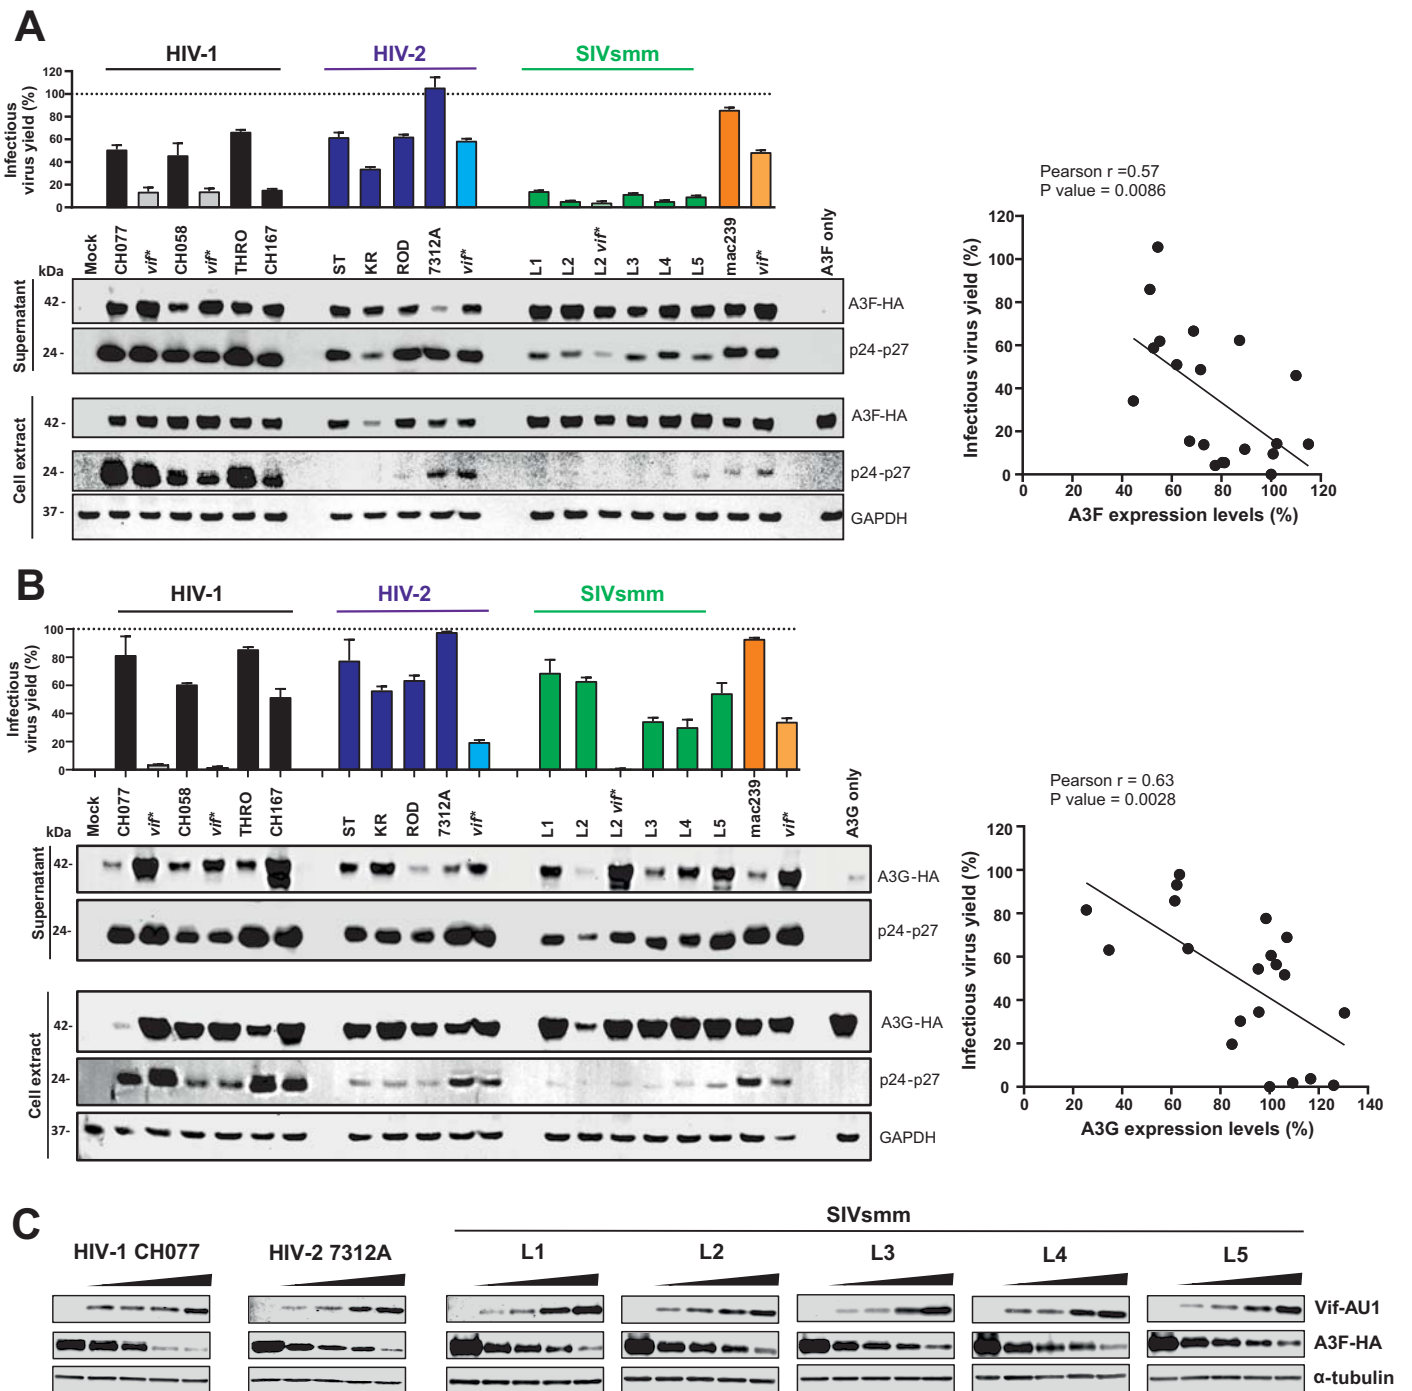

**A**

**APOBEC3F**

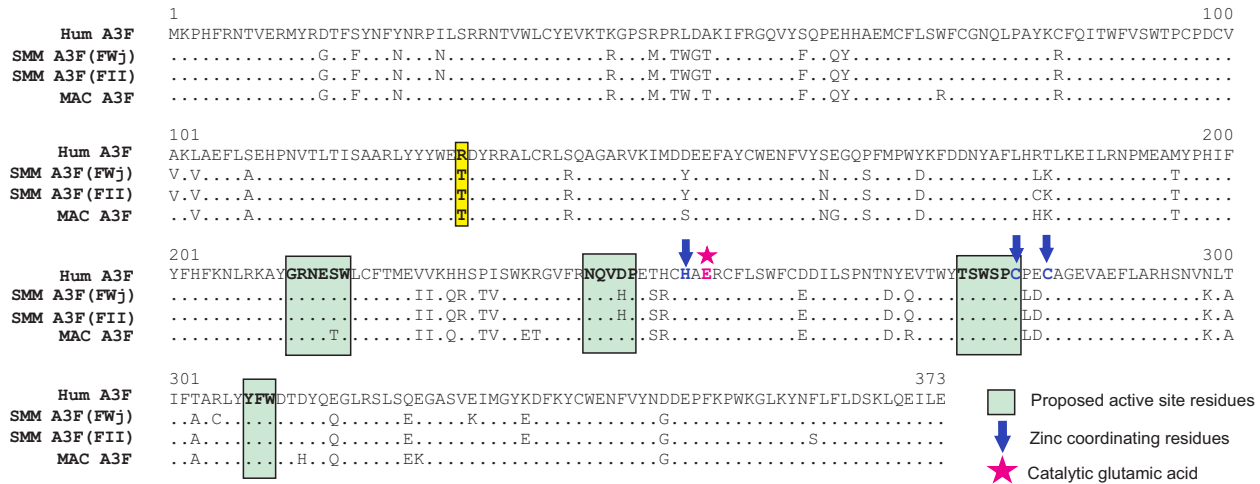

**B**

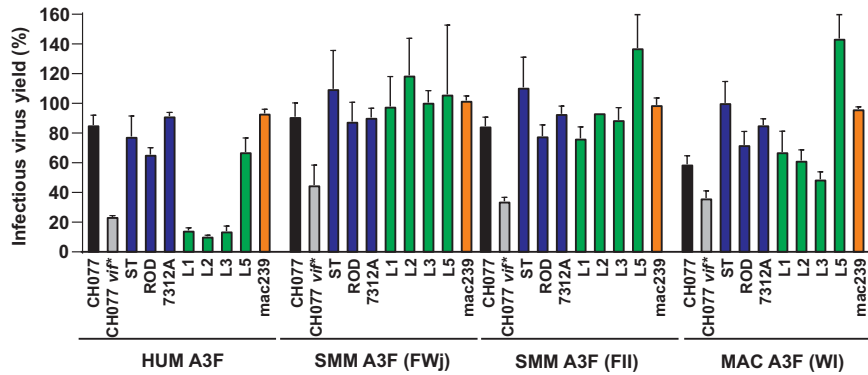

**C**

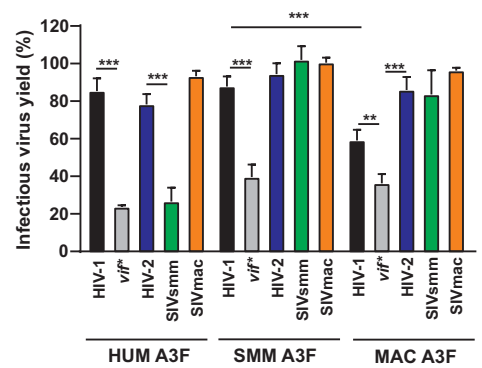

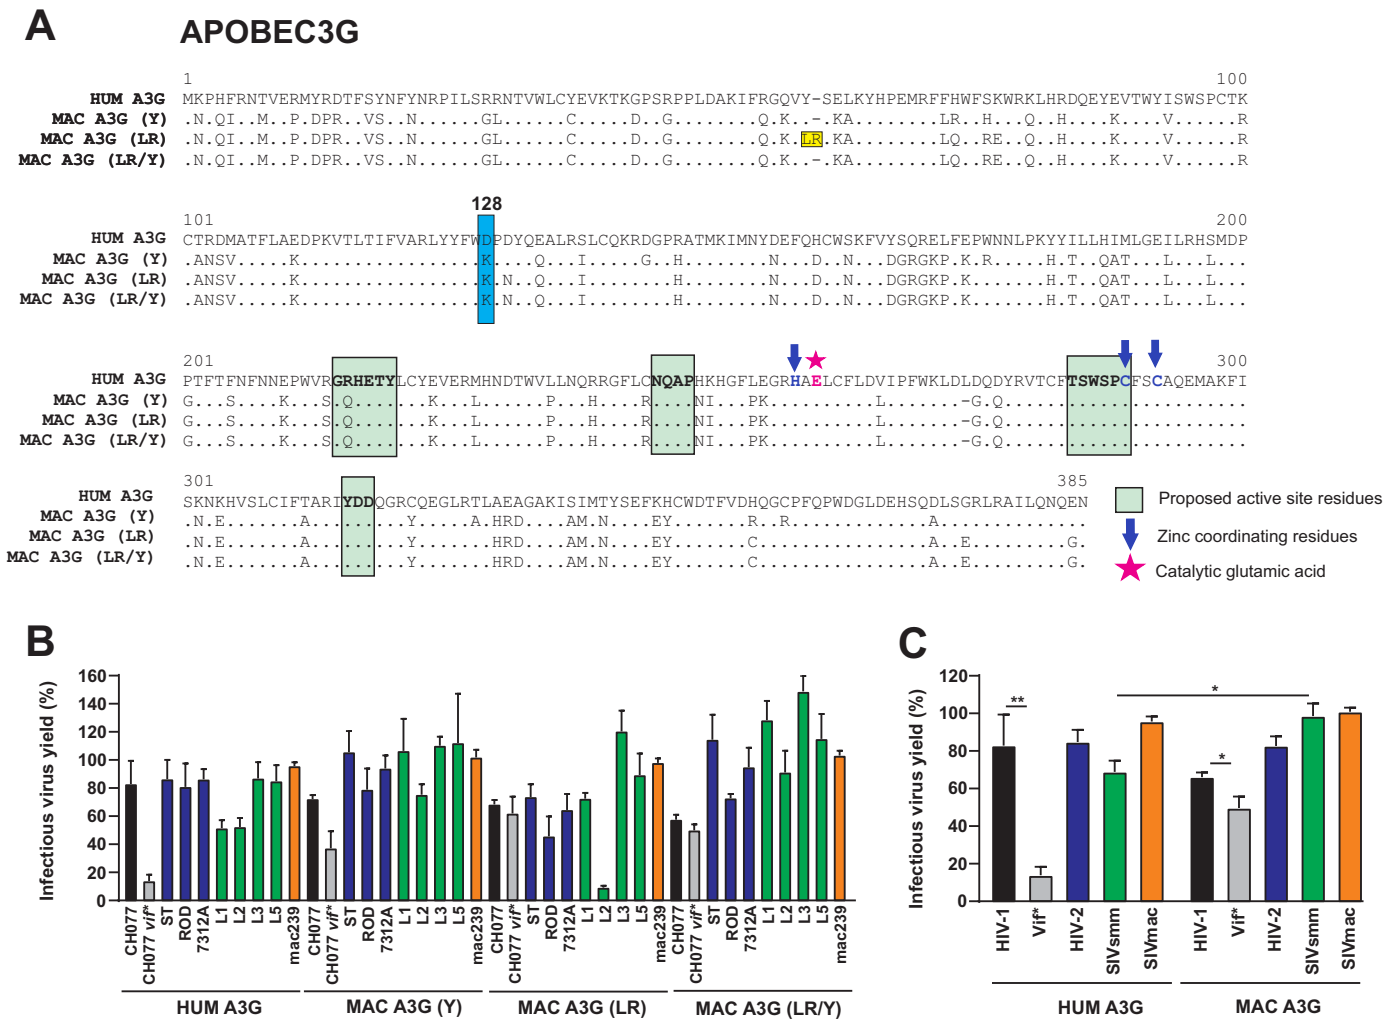

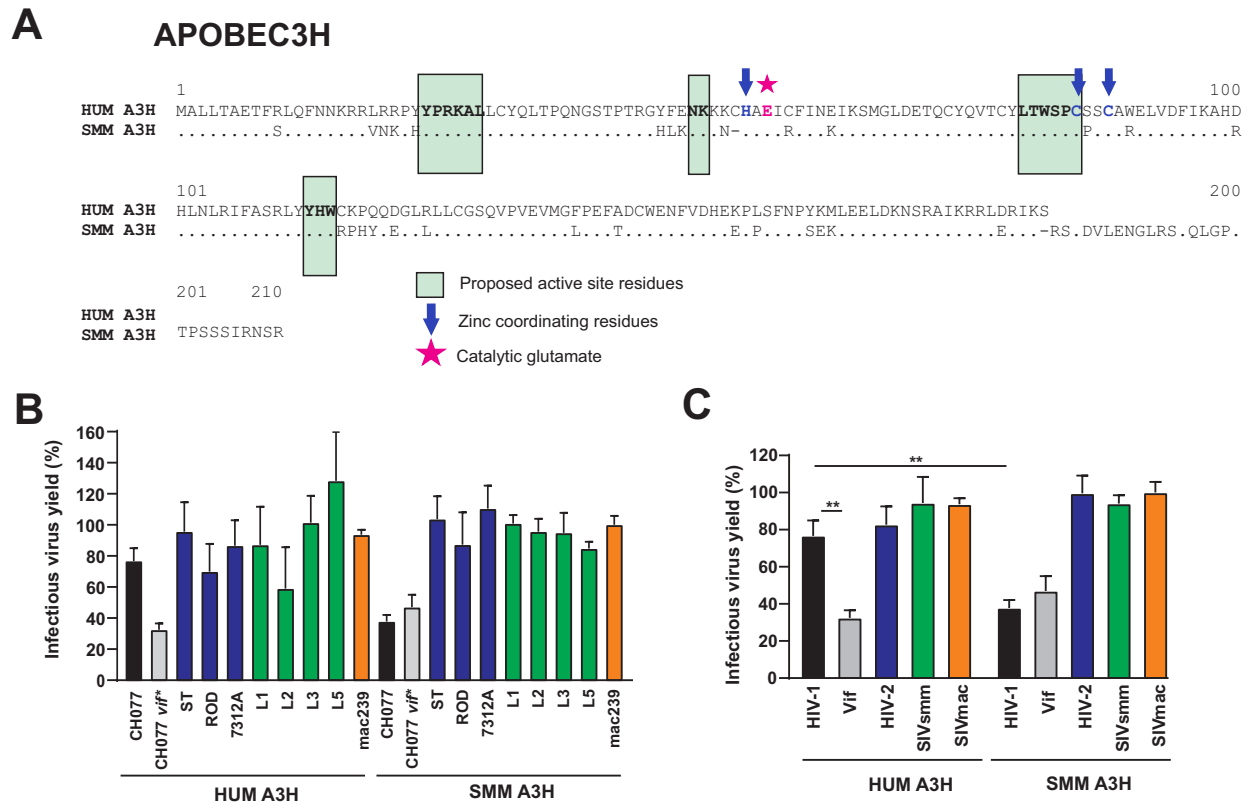



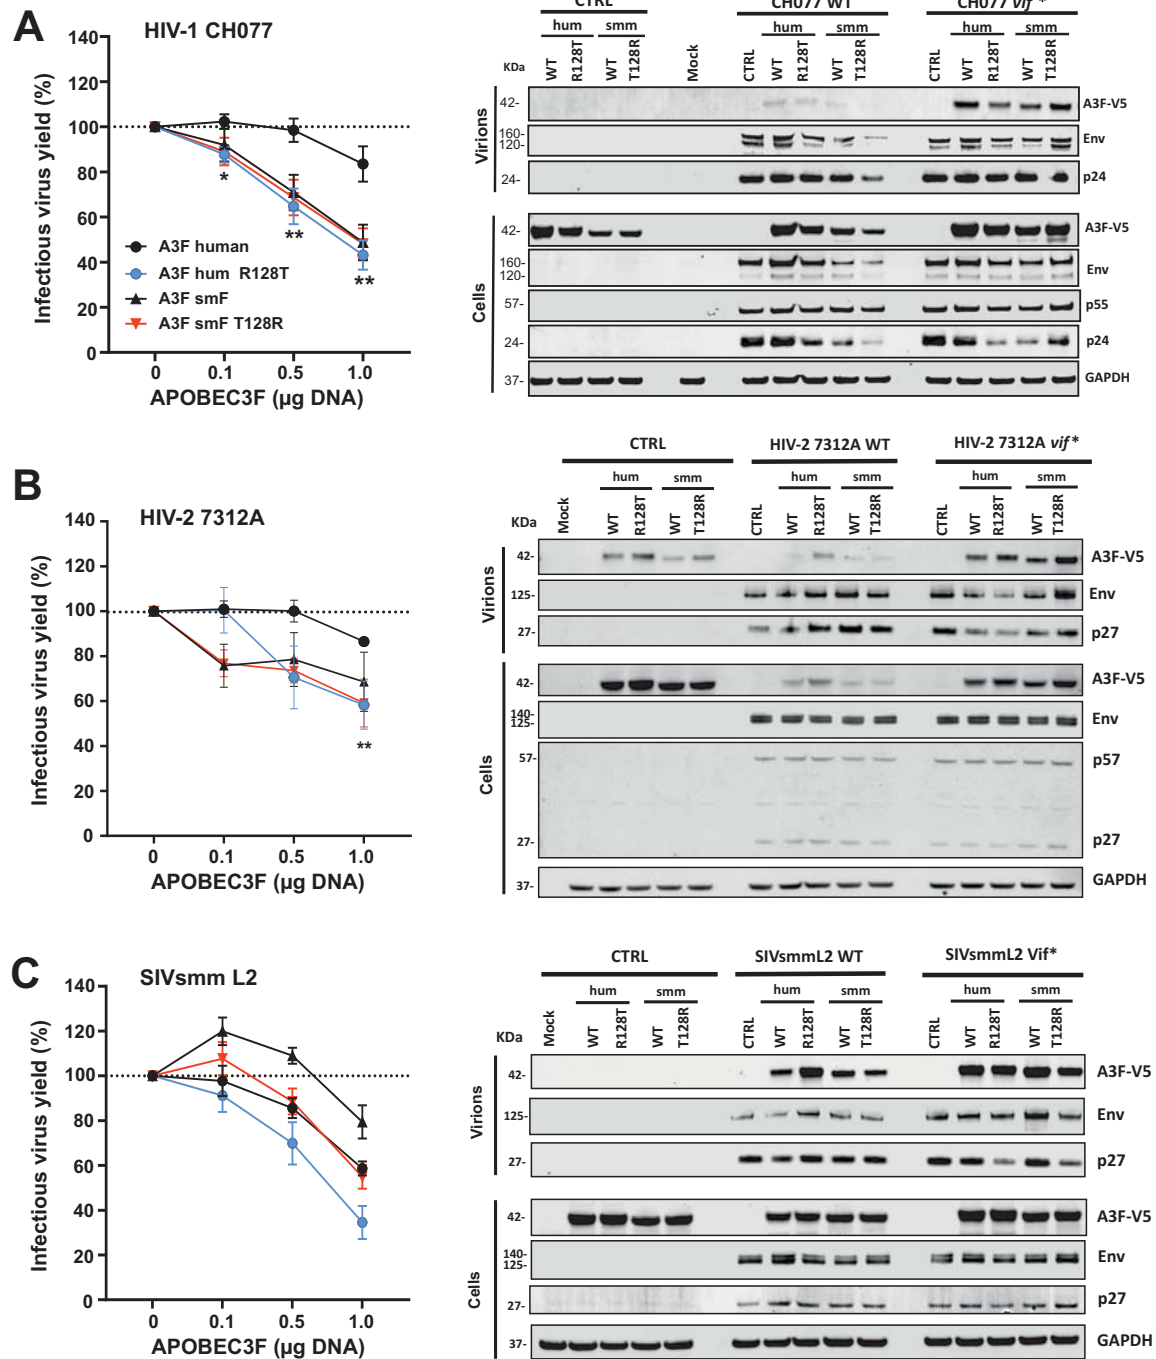

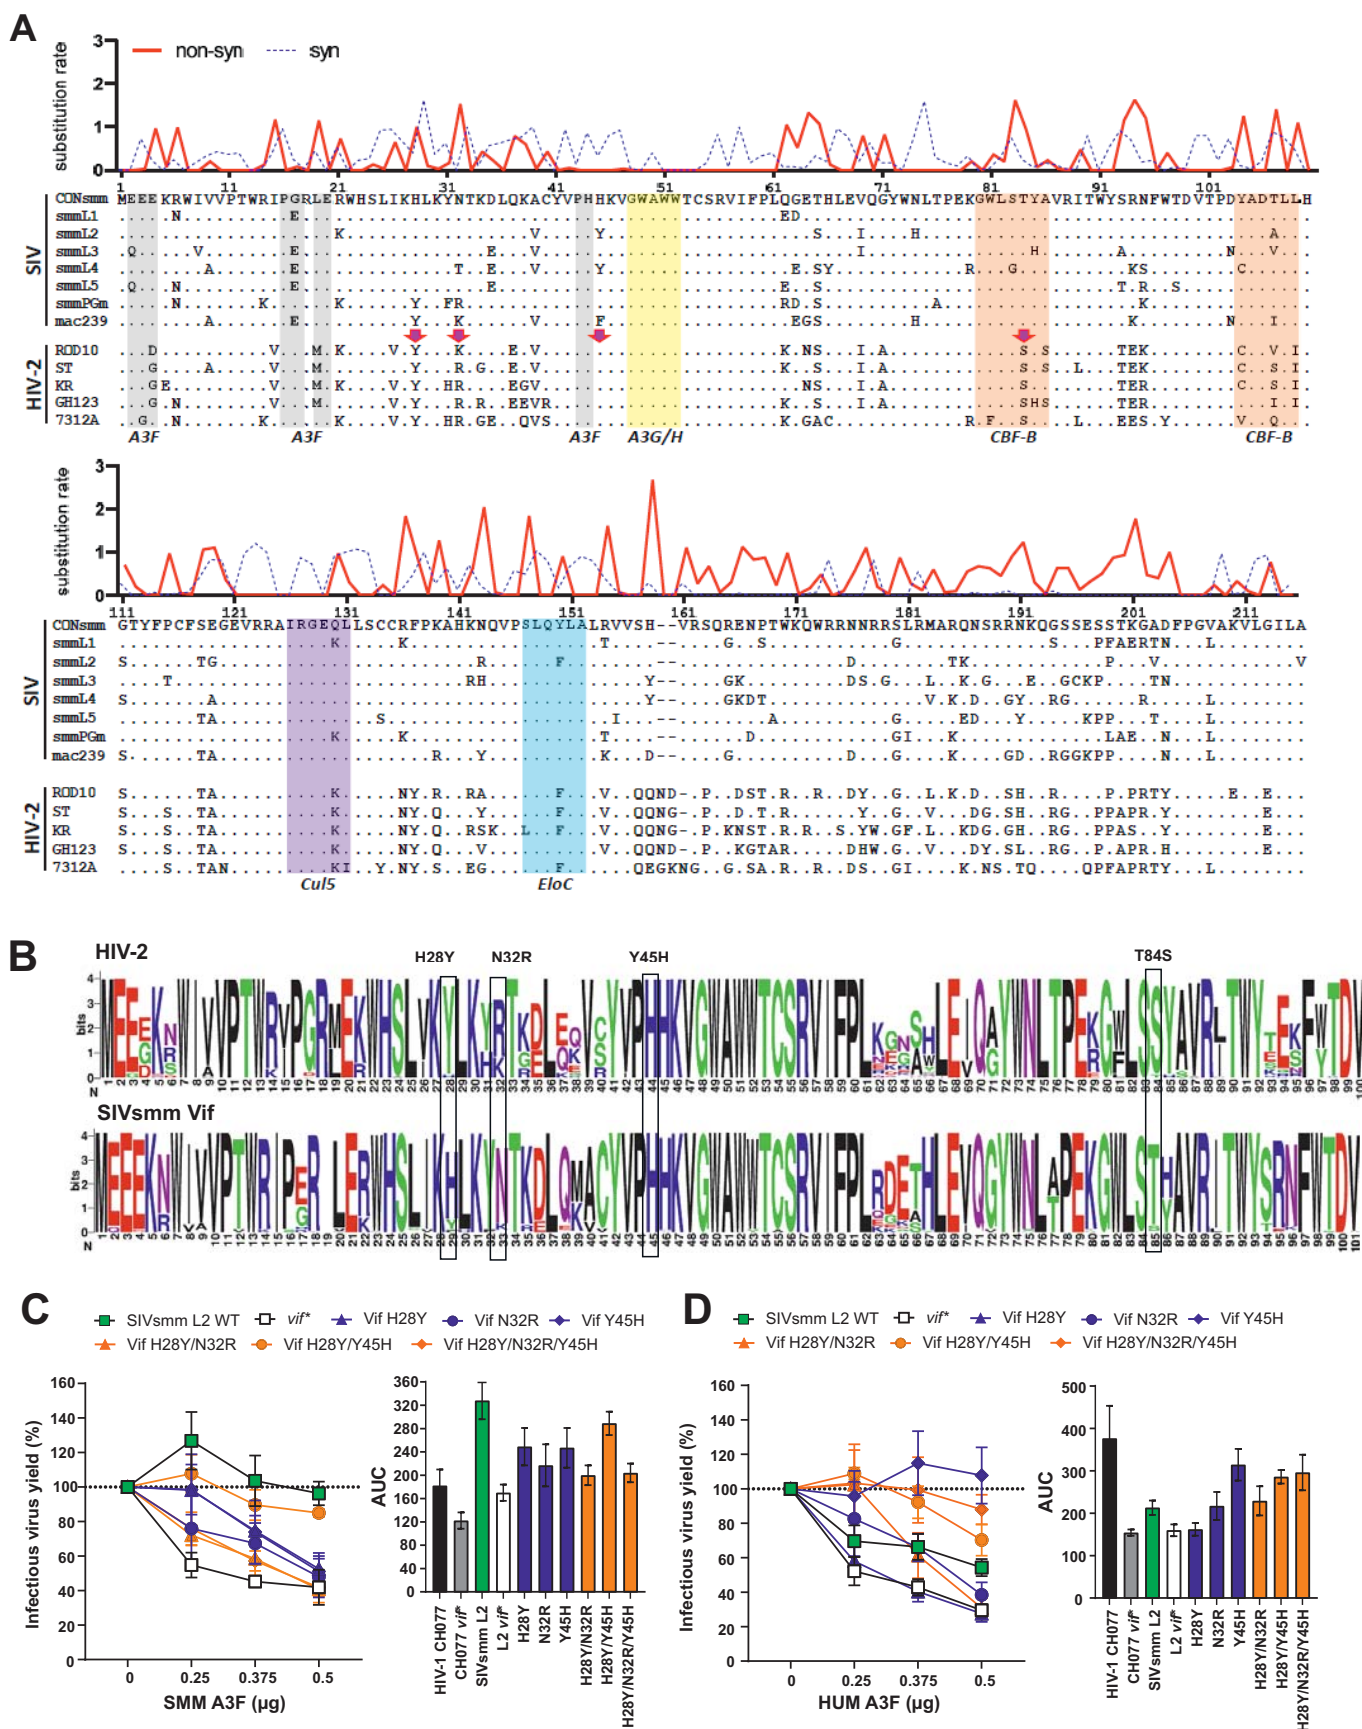

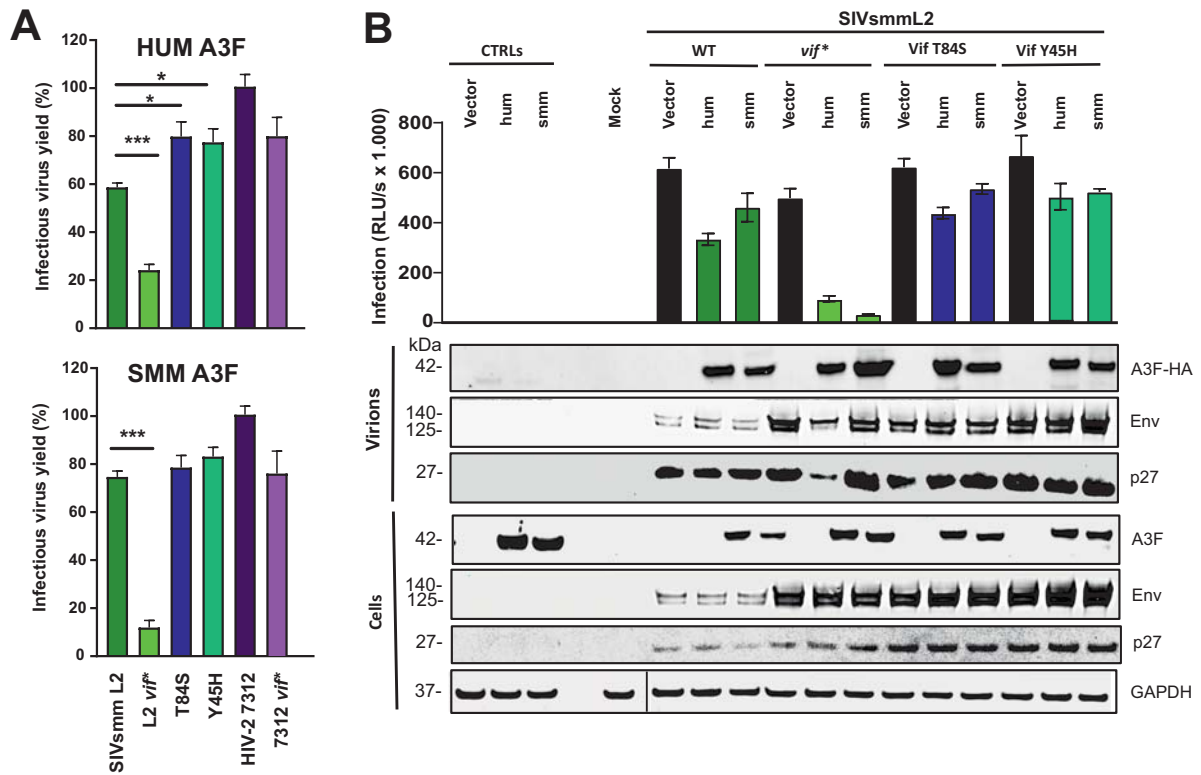

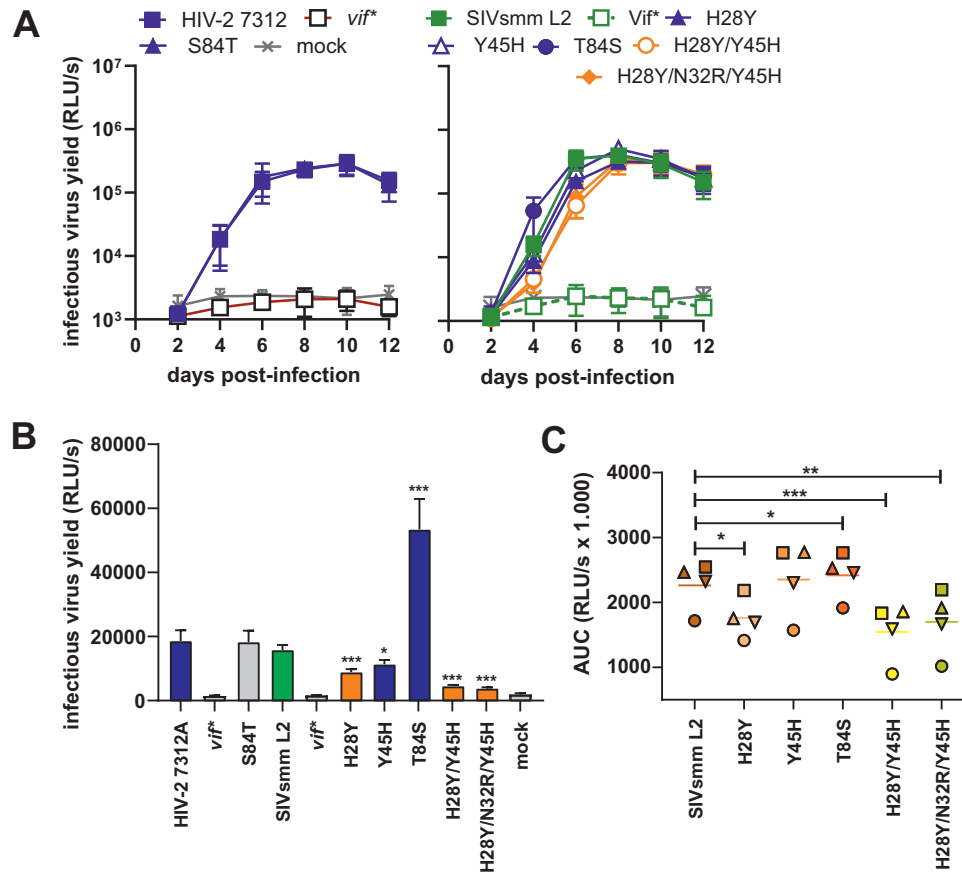

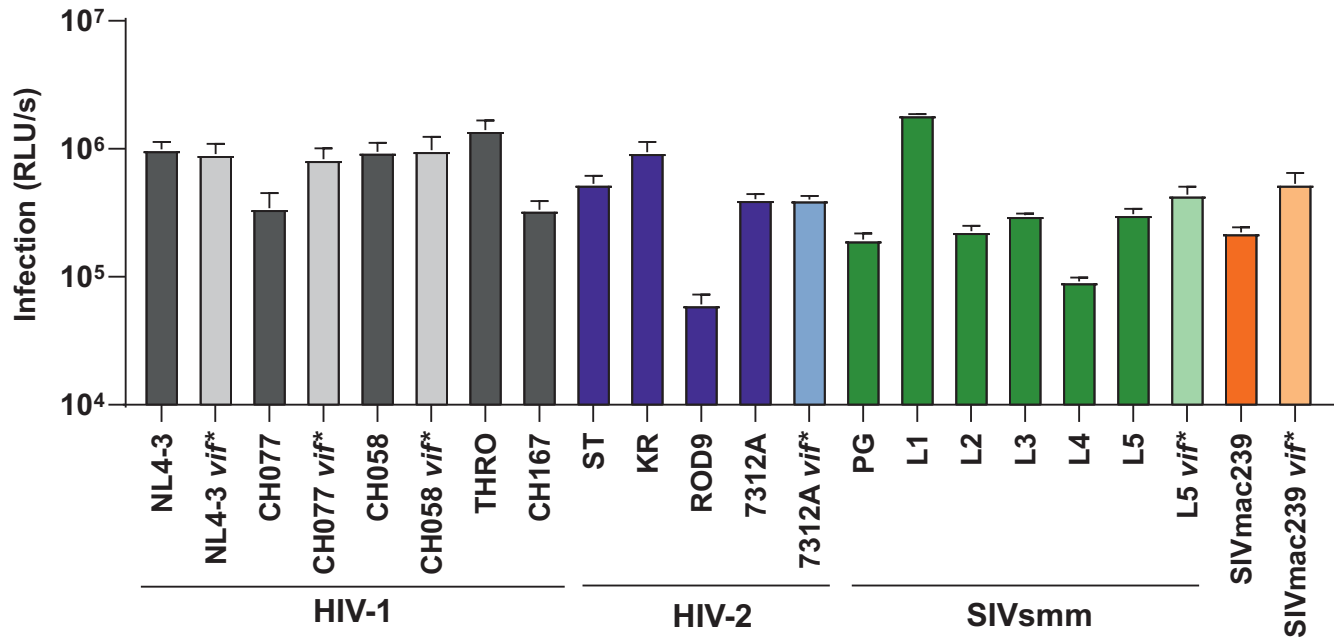

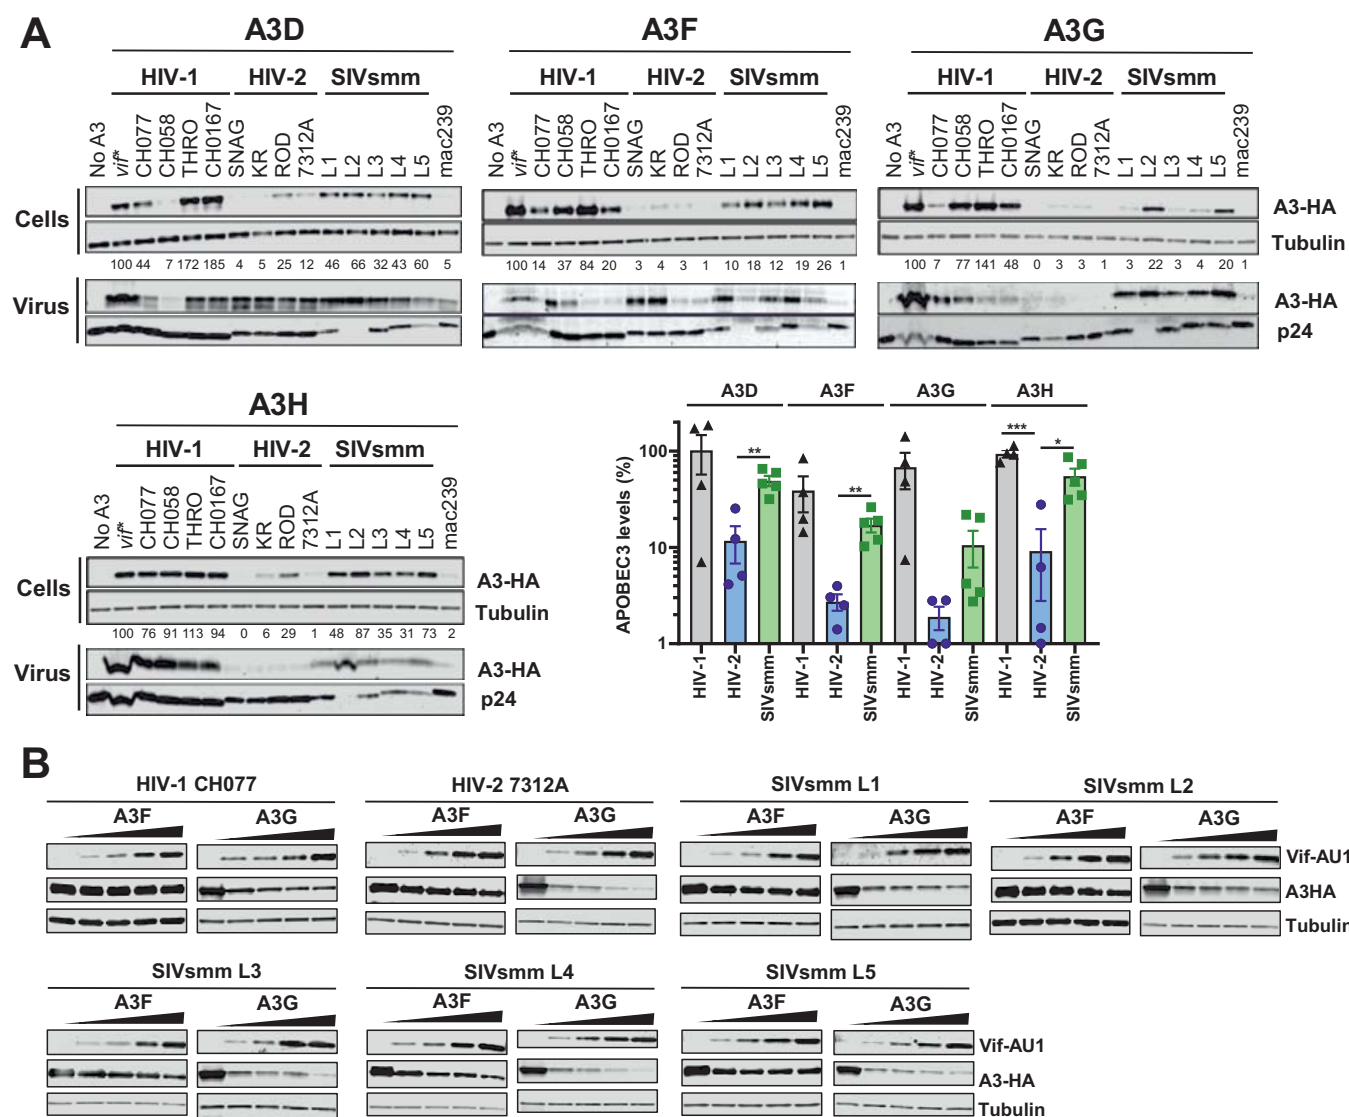

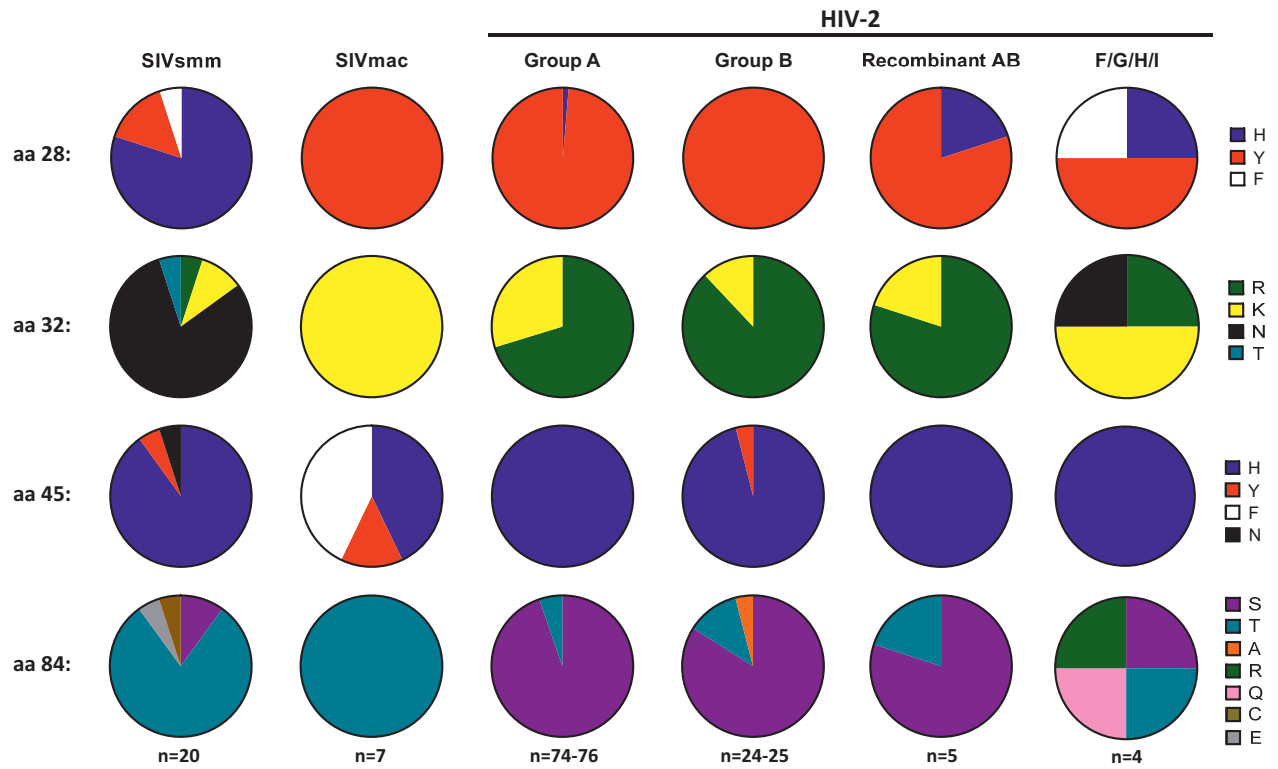

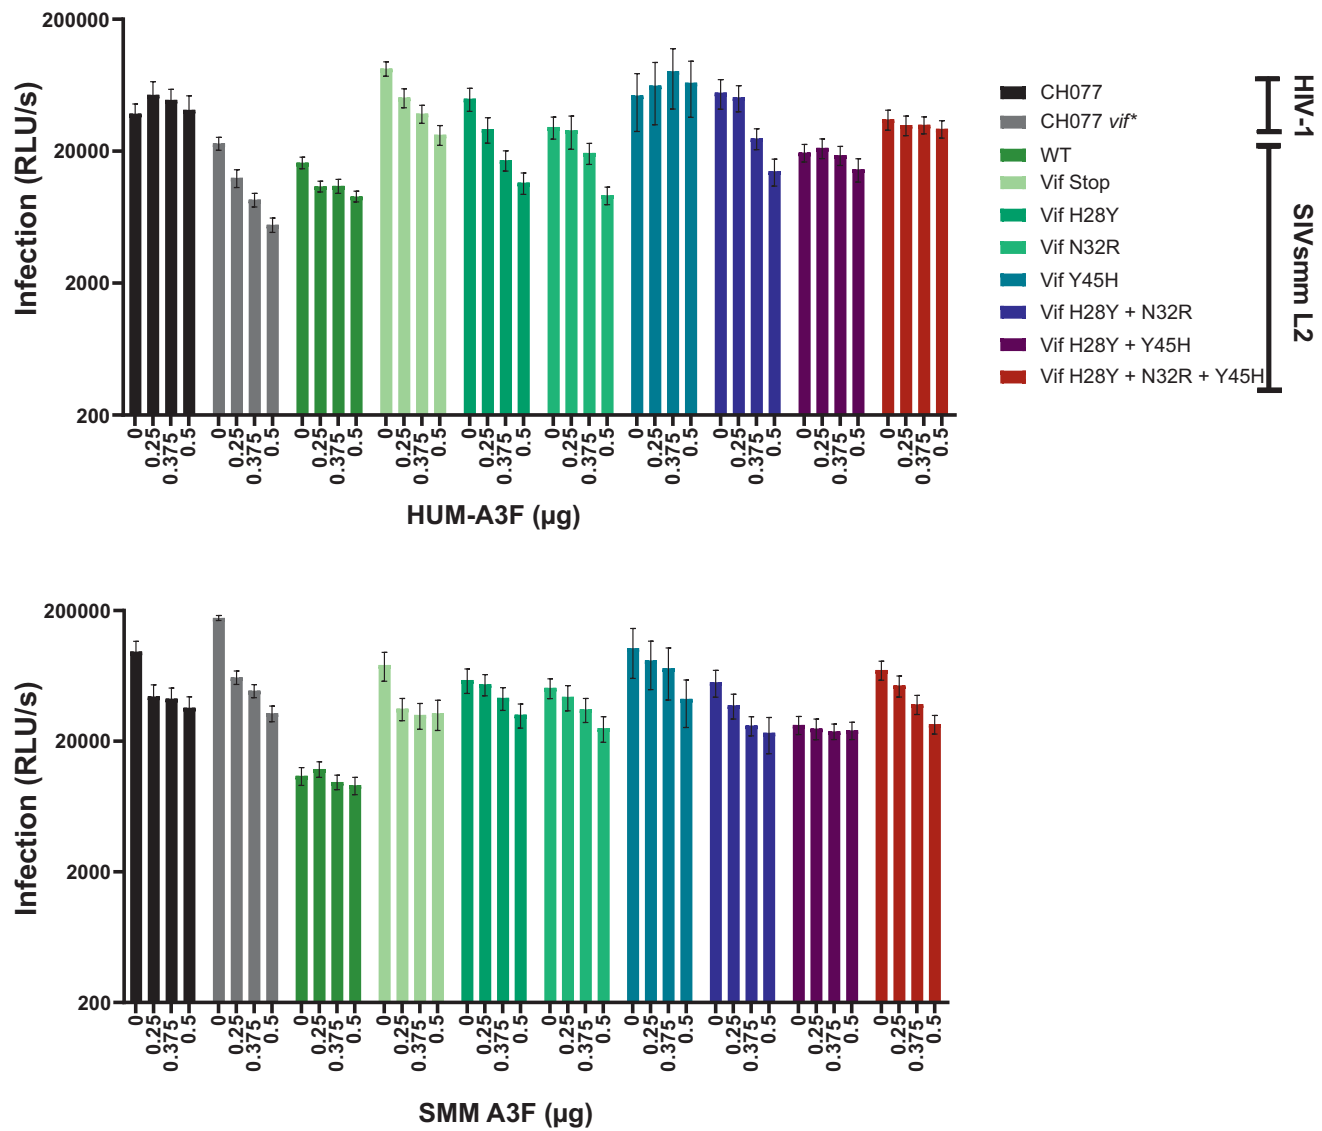



**Table S1. Features and origin of HIV and SIV strains examined.**

| Virus  | Group/Subtype or lineage | IMC                 | Name used       | Origin                                                                                                                                                             | References |
|--------|--------------------------|---------------------|-----------------|--------------------------------------------------------------------------------------------------------------------------------------------------------------------|------------|
| HIV-1  | M/B                      | NL4-3               | HIV-1 M B NL4-3 | Laboratory generated recombinant of HIV-1 isolates NY5 and BRU from symptomatic, chronically infected MSMs; virus was passaged in T cell lines prior to isolation  | [1]        |
|        | M/B                      | CH77_TF1            | HIV-1 M B CH077 | MSM patient diagnosed with acute HIV-1 infection; directly isolated from patient's plasma                                                                          | [2]        |
|        | M/B                      | CH58_TF1            | HIV-1 M B CH058 | MSM patient diagnosed with acute HIV-1 infection, directly isolated from patient's plasma                                                                          | [2]        |
|        | M/B                      | THRO_TF1            | HIV-1 M B THRO  | MSM patient diagnosed with acute HIV-1 infection, directly isolated from patient's plasma                                                                          | [2]        |
|        | M/C                      | CH167               | HIV-1 M C CH167 | 28-year old, sexually infected female patient diagnosed with chronic HIV-1 infection, directly isolated from patient's plasma                                      | [3]        |
| HIV-2  | A                        | ROD                 | HIV-2 A ROD9/10 | 32-year old male AIDS patient; virus was isolated following propagation in T cell line                                                                             | [4]        |
|        |                          | HIV2ST JSP4-27      | HIV-2 A ST      | Asymptomatic female sex worker, virus isolated following propagation of patient's PBMCs with HUT-78 cells                                                          | [5,6]      |
|        |                          | GH123               | HIV-2 A GH123   | Symptomatic 33-year old female sex worker, virus isolated following propagation of patient's PBMCs with MOLT-4/8 T cells; GH123 is derived from isolate GH1        | [7-9]      |
|        |                          | KR                  | HIV-2 A KR      | anonymous patient, virus isolated following following propagation of patient's PBMCs with MOLT-4/8 T cells                                                         | [10,11]    |
|        | A-B recombinant          | 7312A               | HIV-2 AB 7312A  | Symptomatic 32-year old male patient, virus isolated following co-culture of PBMCs with uninfected PBMCs                                                           | [12]       |
| SIVsmm | lineage 1                | SIV.L1. RM174.tf.v1 | SIVsmmL1        | Rhesus macaque experimentally infected with SIVsmm; virus was passaged in two macaques before isolation                                                            | [13,14]    |
|        | lineage 2                | SIV.L2 RM136.tf     | SIVsmmL2        | Rhesus macaque exp. infected with SIVsmm isolate from naturally infected 16-year old male sooty mangabey; virus was passaged three macaques before isolation       | [13,14]    |
|        | lineage 3                | SIV.L3 RM175.tf     | SIVsmmL3        | Rhesus macaque exp. infected with an SIVsmm isolate from a naturally infected 14-year old male sooty mangabey; virus was passaged in two macaques before isolation | [13,14]    |
|        | lineage 4                | SIV.L4 RM57.tf      | SIVsmmL4        | Rhesus macaque exp. infected with SIVsmm isolate from naturally infected 30-year old female sooty mangabey; virus was passaged in two macaques before isolation    | [13,14]    |
|        | lineage 5                | SIV.L5 DE28.tf      | SIVsmmL5        | Rhesus macaque exp. infected with SIVsmm from 13-year old male sooty mangabey; virus was passaged in two macaques before isolation                                 | [13,14]    |
|        | n.a.                     | PGm5.3              | SIVsmm PG       | Pig-tailed macaque exp. infected with SM blood containing SIVsmm; virus was passaged in human PBMCs before isolation                                               | [15]       |
| SIVmac | n.a.                     | 239                 | SIVmac239       | Rhesus macaque exp. infected with extensively rhesus-passaged virus of SM origin; isolated following passage in HUT-78 cells                                       | [16,17]    |

## Supplemental references

1. Adachi A, Gendelman HE, Koenig S, Folks T, Willey R, Rabson A, et al. Production of acquired immunodeficiency syndrome-associated retrovirus in human and nonhuman cells transfected with an infectious molecular clone. *J Virol.* 1986;59: 284–291. doi:10.1128/jvi.59.2.284-291.1986
2. Ochsenbauer C, Edmonds TG, Ding H, Keele BF, Decker J, Salazar MG, et al. Generation of Transmitted/Founder HIV-1 Infectious Molecular Clones and Characterization of Their Replication Capacity in CD4 T Lymphocytes and Monocyte-Derived Macrophages. *J Virol.* 2012;86: 2715–2728. doi:10.1128/JVI.06157-11
3. Parrish NF, Gao F, Li H, Giorgi EE, Barbian HJ, Parrish EH, et al. Phenotypic properties of transmitted founder HIV-1. *Proc Natl Acad Sci.* 2013;110: 6626–6633. doi:10.1073/pnas.1304288110
4. Clavel F, Guyader M, Guétard D, Sallé M, Montagnier L, Alizon M. Molecular cloning and polymorphism of the human immune deficiency virus type 2. *Nature.* 1986;324: 691–695. doi:10.1038/324691a0
5. Kong LI, Lee SW, Kappes JC, Parkin JS, Decker D, Hoxie JA, et al. West African HIV-2-related human retrovirus with attenuated cytopathicity. *Science.* 1988;240: 1525–9. Available: <http://www.ncbi.nlm.nih.gov/pubmed/3375832>
6. Kappes JC, Morrow CD, Lee SW, Jameson BA, Kent SB, Hood LE, et al. Identification of a novel retroviral gene unique to human immunodeficiency virus type 2 and simian immunodeficiency virus SIVMAC. *J Virol.* 1988;62: 3501–3505. doi:10.1128/jvi.62.9.3501-3505.1988
7. Ishikawa K, Tsujimoto H, Nakai M, Mingle JAA, Osei-Kwasi M, Aggrey SE, et al. Isolation and characterization of HIV-2 from an AIDS patient in Ghana. *AIDS.* 1988;2: 383–388. doi:10.1097/00002030-198810000-00009
8. Hasegawa A, Tsujimoto H, Maki N, Ishikawa KI, Miura T, Fukasawa M, et al. Genomic Divergence of HIV-2 from Ghana. *AIDS Res Hum Retroviruses.* 1989;5: 593–604. doi:10.1089/aid.1989.5.593
9. Shibata R, Miura T, Hayami M, Ogawa K, Sakai H, Kiyomasu T, et al. Mutational analysis of the human immunodeficiency virus type 2 (HIV-2) genome in relation to HIV-1 and simian immunodeficiency virus SIV (AGM). *J Virol.* 1990;64: 742–7. Available: <http://www.ncbi.nlm.nih.gov/pubmed/2296082>
10. Talbott R, Kraus G, Looney D, Wong-Staal F. Mapping the determinants of human immunodeficiency virus 2 for infectivity, replication efficiency, and cytopathicity. *Proc Natl Acad Sci U S A.* 1993;90: 4226–4230. doi:10.1073/pnas.90.9.4226
11. Kraus G, Radaelli A, Talbott R, Leavitt M, Schmidt A, Badel P, et al. Characterization of a molecular clone of HIV type 2 infectious for *Macaca nemestrina*. *AIDS Res Hum Retroviruses.* 1998;14: 65–77. doi:10.1089/aid.1998.14.65
12. Gao F, Yue L, Robertson DL, Hill SC, Hui H, Biggar RJ, et al. Genetic diversity of human immunodeficiency virus type 2: evidence for distinct sequence subtypes with differences in virus biology. *J Virol.* 1994;68: 7433–47. Available: <http://www.ncbi.nlm.nih.gov/pubmed/7933127>
13. Mason RD, Welles HC, Adams C, Chakrabarti BK, Gorman J, Zhou T, et al. Targeted Isolation of Antibodies Directed against Major Sites of SIV Env Vulnerability. *PLoS Pathog.* 2016;12. doi:10.1371/journal.ppat.1005537
14. Fischer W, Apetrei C, Santiago ML, Li Y, Gautam R, Pandrea I, et al. Distinct Evolutionary Pressures Underlie Diversity in Simian Immunodeficiency Virus and Human Immunodeficiency Virus Lineages. *J Virol.* 2012;86: 13217–13231. doi:10.1128/jvi.01862-12
15. Novembre FJ, De Rosayro J, O’Neil SP, Anderson DC, Klumpp SA, McClure HM. Isolation and characterization of a neuropathogenic simian immunodeficiency virus derived from a sooty mangabey. *J Virol.* 1998;72: 8841–51. Available: <http://www.ncbi.nlm.nih.gov/pubmed/9765429>
16. Daniel M, Kirchhoff F, Czajak S, Sehgal P, Desrosiers R. Protective effects of a live attenuated SIV vaccine with a deletion in the nef gene. *Science (80- ).* 1992;258: 1938–1941. doi:10.1126/science.1470917
17. Regier DA, Desrosiers RC. The Complete Nucleotide Sequence of a Pathogenic Molecular Clone of Simian Immunodeficiency Virus. *AIDS Res Hum Retroviruses.* 1990;6: 1221–1231. doi:10.1089/aid.1990.6.1221
